# Supplementary material for: Convergent micro-wave assisted synthesis of quinazolinone and its precursor using the bio-sourced solvent pinane
Source: Royal Society of Chemistry journal article supplement (doi:10.1039/d3ra03702a), 2023-01-01
Supplement: d3ra03702a1.pdf [file d3ra03702a1.pdf]

## SUPPORTING INFORMATION

### Table of Contents

|                                                                              |            |
|------------------------------------------------------------------------------|------------|
| <b>1. Experimental</b>                                                       | <b>S2</b>  |
| 1.1. General                                                                 | S2         |
| 1.2. Experiments for Scheme 1, thermal conditions.                           | S2         |
| <b>2. Additional References</b>                                              | <b>S7</b>  |
| <b>3. <math>^1\text{H}</math> and <math>^{13}\text{C}</math> NMR spectra</b> | <b>S7</b>  |
| <b>4. <math>^1\text{H}</math> NMR spectra of crude reaction experiments</b>  | <b>S22</b> |

## 1. Experimental

### 1.1. General

Solvents for solution phase reactions: methanol (MeOH), toluene (PhMe) were purchased in anhydrous grade from Sigma-Aldrich and used without further purification. Ethyl acetate (EtOAc), petroleum ether (PET), dichloromethane (CH<sub>2</sub>Cl<sub>2</sub>) and diethyl ether (Et<sub>2</sub>O) were used as received. Reagents were purchased at the highest commercial quality and used without further purification unless otherwise stated. Evaporations were conducted under reduced pressure at temperatures less than 40 °C unless otherwise noted. Reactions were monitored by analytical thin layer chromatography (TLC) carried out on ALUGRAM Xtra SIL G/UV254, Macherey-Nagel silica gel plates. Compounds were visualized with a UV lamp ( $\lambda$  254 nm) and stained with a solution of potassium permanganate. NMR spectra of samples in the indicated solvent were recorded on a Bruker Advance 400 or 500 MHz spectrometer and were calibrated using residual solvent as internal reference. The following abbreviations were used to indicate multiplicities: s = singlet, bs = broad singlet, d = doublet, t = triplet, q = quartet, quint = quintuplet, m = multiplet, and AB = AB quartet. Low resolution (ESIMS) and/or high resolution mass spectrometric analyses (HRMS) were obtained by electrospray ionization on a Bruker Q-TOF Impact HD apparatus and performed either at the PLATeforme INstrumentale d'Analyses (PLATINA) mass spectrometry facility of the Institut de Chimie des Milieux et Matériaux de Poitiers (IC2MP, CNRS-UMR 7285, 86000 Poitiers, France).

### 1.2. Experiments for Scheme 1, thermal conditions.

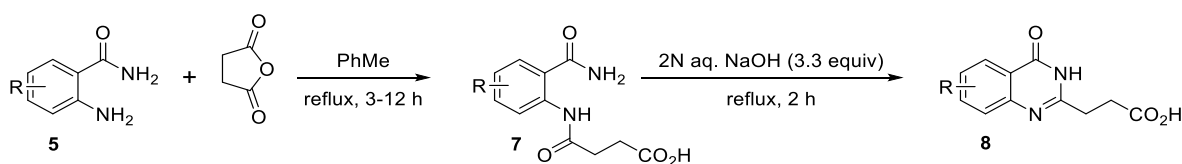

**Scheme S32.** Synthesis of compound 25.

### Compound 7b

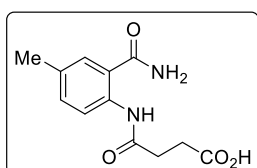

According to the procedure described in the literature,<sup>[1]</sup> in a flask equipped with a condenser, 2-amino-5-methylbenzamide (600 mg, 4 mmol, 1 equiv) and succinic anhydride (400 mg, 4 mmol, 1 equiv) were mixed in 5 ml of toluene. The suspension

was vigorously refluxed for 3 h and then cooled to RT. The resulting white powder was filtered, washed with Et<sub>2</sub>O and dried (945 mg, 95%). **R<sub>f</sub>** = 0.25 (MeOH/CH<sub>2</sub>Cl<sub>2</sub> 10:90); **mp** 223-225 °C; **<sup>1</sup>H NMR** (400 MHz, DMSO-*d*<sub>6</sub>)  $\delta$  (ppm): 12.16 (bs, 1H), 11.57 (s, 1H), 8.32 (d, *J* = 8.5 Hz, 1H), 8.21 (s, 1H), 6.67 (s, 1H), 7.62 (d, *J* = 1.5 Hz, 1H), 7.28 (dd, *J* = 8.5, 1.5 Hz, 1H), 2.56-2.53 (m, 4H), 2.28 (s, 3H); **<sup>13</sup>C NMR** (100 MHz, DMSO-*d*<sub>6</sub>)  $\delta$  (ppm): 173.7, 170.9, 169.7, 137.3, 132.6, 131.3, 128.9, 120.1, 119.5, 32.0, 28.8, 20.4; **HRMS** calcd for C<sub>12</sub>H<sub>15</sub>N<sub>2</sub>O<sub>4</sub> [M+H]<sup>+</sup> 251.1032, found 251.1025.

### Compound 8b

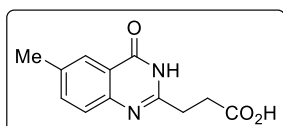

According to the procedure described in the literature,<sup>[1]</sup> in a flask equipped with a condenser, compound **E** (874 mg, 3.5 mmol, 1 equiv) was dissolved in an aqueous 2N NaOH solution (6 ml, 3.3 equiv). The resulting solution was refluxed for 1 h 30 and then cooled to RT. The pH was carefully adjusted to pH 5-6 with aqueous 3N HCl solution under vigorous stirring. The resulting white powder was filtered, washed with water and then dried (0.80 g, quant.). **R<sub>f</sub>** = 0.25 (MeOH/CH<sub>2</sub>Cl<sub>2</sub> 15:85); **mp** 270-272 °C; **<sup>1</sup>H NMR** (400 MHz, DMSO-*d*<sub>6</sub>)  $\delta$  (ppm): 12.13 (bs, 1H), 7.85 (s, 1H), 7.58 (d, *J* = 7.4 Hz, 1H), 7.46 (d, *J* = 8.2 Hz, 1H), 2.82 (t, *J* = 6.6 Hz, 2H), 2.73 (t, *J* = 6.5 Hz, 2H), 2.40 (s, 3H); **<sup>13</sup>C NMR** (100 MHz, DMSO-*d*<sub>6</sub>)  $\delta$  (ppm): 173.9, 161.9, 155.6, 146.8, 135.9, 135.9, 126.8, 125.3, 120.7, 30.1, 29.2, 21.0; **HRMS** calcd for C<sub>12</sub>H<sub>13</sub>N<sub>2</sub>O<sub>3</sub> [M+H]<sup>+</sup> 233.0926, found 233.0917.

### Compound 7c

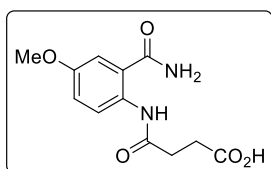

According to the procedure described in the literature,<sup>[1]</sup> in a flask equipped with a condenser, 2-amino-5-methoxybenzamide (2.49 g, 15 mmol, 1 equiv) and succinic anhydride (1.5 g, 15 mmol, 1 equiv) were mixed in 19 ml of toluene. The suspension was vigorously refluxed for 2 h and then cooled to RT. The resulting light grey powder was filtered, washed with Et<sub>2</sub>O and dried (3.92 g, 98%). **R<sub>f</sub>** = 0.10 (MeOH/CH<sub>2</sub>Cl<sub>2</sub> 5:95); **mp** 222-224 °C; **<sup>1</sup>H NMR** (400 MHz, DMSO-*d*<sub>6</sub>)  $\delta$  (ppm): 12.16 (bs, 1H), 11.32 (s, 1H), 8.30 (d, *J* = 9.1 Hz, 1H), 8.24 (s, 1H), 7.72 (s, 1H), 7.31 (d, *J* = 2.9 Hz, 1H), 7.08 (dd, *J* = 9.1, 2.9 Hz, 1H), 3.77 (s, 3H), 2.52 (bs, 4H); **<sup>13</sup>C NMR** (100 MHz, DMSO-*d*<sub>6</sub>)  $\delta$  (ppm): 173.7, 170.4, 169.5, 154.1, 132.8, 121.9, 121.3, 117.7, 113.4, 55.5, 31.9, 28.8; **HRMS** calcd for C<sub>12</sub>H<sub>14</sub>N<sub>2</sub>NaO<sub>5</sub> [M+Na]<sup>+</sup> 289.0800, found 289.0789.

### Compound 8c

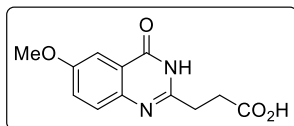

According to the procedure described in the literature,<sup>[1]</sup> in a flask equipped with a condenser, compound **E** (3.6 g, 13.5 mmol, 1 equiv) was dissolved in an aqueous 2N NaOH solution (22.3 ml, 3.3 equiv). The resulting solution was refluxed for 2 h and then cooled to RT. The pH was carefully adjusted to pH 5-6 with aqueous 3N HCl solution under vigorous stirring. The resulting white powder was filtered, washed with water and then dried (3.07 g, 91%).  $R_f = 0.23$  (MeOH/CH<sub>2</sub>Cl<sub>2</sub> 10:90); **mp** 270-272 °C; <sup>1</sup>H NMR (400 MHz, DMSO-*d*<sub>6</sub>)  $\delta$  (ppm): 12.19 (bs, 1H), 7.51 (d,  $J = 8.9$  Hz, 1H), 7.46 (d,  $J = 2.7$  Hz, 1H), 7.35 (d,  $J = 8.8, 2.7$  Hz, 1H), 3.84 (s, 3H), 2.82 (t,  $J = 6.6$  Hz, 2H), 2.72 (t,  $J = 6.6$  Hz, 2H); <sup>13</sup>C NMR (100 MHz, DMSO-*d*<sub>6</sub>)  $\delta$  (ppm): 173.7, 161.6, 157.3, 154.0, 143.2, 128.5, 123.7, 121.6, 105.8, 55.6, 30.0, 29.0; **HRMS** calcd for C<sub>12</sub>H<sub>13</sub>N<sub>2</sub>O<sub>4</sub> [M+H]<sup>+</sup> 249.0875, found 249.0865.

### Compound 7d

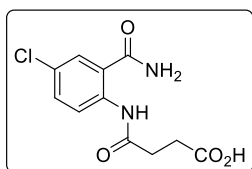

According to the procedure described in the literature,<sup>[1]</sup> in a flask equipped with a condenser, 2-amino-5-chlorobenzamide (1.7 g, 10 mmol, 1 equiv) and succinic anhydride (1 g, 10 mmol, 1 equiv) were mixed in 12.5 ml of toluene. The suspension was vigorously refluxed for 3 h and then cooled to RT. The resulting white solid was filtered, washed with Et<sub>2</sub>O and dried (2.6 g, 96%).  $R_f = 0.10$  (MeOH/CH<sub>2</sub>Cl<sub>2</sub> 5:95); **mp** 239-241 °C; <sup>1</sup>H NMR (400 MHz, DMSO-*d*<sub>6</sub>)  $\delta$  (ppm): 12.18 (bs, 1H), 11.61 (s, 1H), 8.45 (d,  $J = 9.0$  Hz, 1H), 8.36 (s, 1H), 7.86 (d,  $J = 2.4$  Hz, 2H), 7.55 (dd,  $J = 9.0, 2.5$  Hz, 1H), 2.57-2.53 (m, 4H); <sup>13</sup>C NMR (100 MHz, DMSO-*d*<sub>6</sub>)  $\delta$  (ppm): 173.6, 170.2, 169.4, 138.5, 131.9, 128.2, 126.1, 121.8, 121.2, 32.1, 28.7; **HRMS** calcd for C<sub>11</sub>H<sub>12</sub>ClN<sub>2</sub>O<sub>4</sub> [M+H]<sup>+</sup> 271.0486, found 271.0479.

### Compound 8d

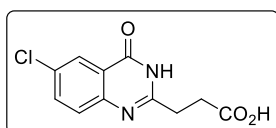

According to the procedure described in the literature,<sup>[1]</sup> in a flask equipped with a condenser, compound **A** (2.48 g, 9.2 mmol, 1 equiv) was dissolved in an aqueous 2N NaOH solution (15 ml, 3.3 equiv). The resulting solution was refluxed for 2 h and then cooled to RT. The pH was carefully adjusted to pH 5-6 with aqueous 3N HCl solution under vigorous stirring. The resulting white powder was filtered, washed with water and then dried (2.31 g, 99.5%).  $R_f = 0.30$  (MeOH/CH<sub>2</sub>Cl<sub>2</sub> 15:85); **mp** 252-254 °C; <sup>1</sup>H NMR (400 MHz, DMSO-*d*<sub>6</sub>)  $\delta$  (ppm): 12.40 (bs, 1H), 8.00 (d,  $J = 2.5$  Hz, 1H), 7.79 (dd,  $J = 8.7, 2.5$  Hz, 1H), 7.59 (d,  $J = 8.7$  Hz, 1H), 2.87-2.83 (m, 2H), 2.75-2.72 (m, 2H); <sup>13</sup>C NMR (100 MHz, DMSO-

$d_6$ )  $\delta$  (ppm): 173.6, 160.8, 157.1, 147.4, 134.5, 130.3, 129.1, 124.8, 122.2, 29.8, 29.2; **HRMS** calcd for  $C_{11}H_{10}ClN_2O_3$   $[M+H]^+$  253.0380, found 253.0372.

### Compound 7e

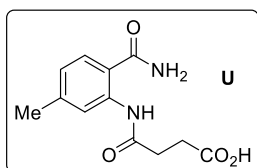

According to the procedure described in the literature,<sup>[1]</sup> in a flask equipped with a condenser, 2-amino-4-methylbenzamide (1.5 g, 10 mmol, 1 equiv) and succinic anhydride (1.0 g, 10 mmol, 1 equiv) were mixed in 12.5 ml of toluene. The suspension was vigorously refluxed for 3 h and then cooled to RT. The resulting yellow powder was filtered, washed with Et<sub>2</sub>O and dried (2.3 g, 92%).  $R_f$  = 0.21 (MeOH/CH<sub>2</sub>Cl<sub>2</sub> 10:90); **mp** 240-241 °C; **<sup>1</sup>H NMR** (400 MHz, DMSO- $d_6$ )  $\delta$  (ppm): 12.18 (bs, 1H), 11.88 (s, 1H), 8.33 (s, 1H), 8.20 (s, 1H), 7.70 (d,  $J$  = 8.0 Hz 1H), 7.64 (s, 1H), 6.91 (dd,  $J$  = 8.0, 1.0 Hz, 1H), 2.57-2.52 (m, 4H), 2.31 (s, 3H); **<sup>13</sup>C NMR** (100 MHz, DMSO- $d_6$ )  $\delta$  (ppm): 173.8, 170.9, 170.0, 142.5, 140.0, 128.6, 122.9, 120.2, 116.3, 32.2, 28.7, 21.5; **HRMS** calcd for  $C_{12}H_{14}N_2NaO_4$   $[M+Na]^+$  273.0851, found 273.0843.

### Compound 8e

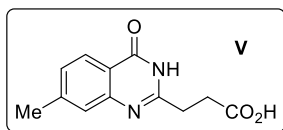

According to the procedure described in the literature,<sup>[1]</sup> in a flask equipped with a condenser, compound **E** (2.2 g, 8.8 mmol, 1 equiv) was dissolved in an aqueous 2N NaOH solution (14.5 ml, 3.3 equiv). The resulting solution was refluxed for 4 h and then cooled to RT. The pH was carefully adjusted to pH 5-6 with aqueous 3N HCl solution under vigorous stirring. The resulting light brown powder was filtered, washed with water and then dried (2.0 g, 97.9%).  $R_f$  = 0.31 (MeOH/CH<sub>2</sub>Cl<sub>2</sub> 15:85); **mp** 241-243 °C; **<sup>1</sup>H NMR** (400 MHz, DMSO- $d_6$ )  $\delta$  (ppm): 12.12 (bs, 1H), 7.95 (d,  $J$  = 8.0 Hz, 1H), 7.38 (s, 1H), 7.28 (dd,  $J$  = 8.1, 1.1 Hz, 1H), 2.83 (t,  $J$  = 6.8 Hz, 2H), 2.73 (t,  $J$  = 6.4 Hz, 2H), 2.43 (s, 3H); **<sup>13</sup>C NMR** (100 MHz, DMSO- $d_6$ )  $\delta$  (ppm): 173.9, 162.0, 156.6, 148.9, 145.2, 127.8, 126.6, 125.9, 118.6, 30.1, 29.3, 21.6; **HRMS** calcd for  $C_{12}H_{13}N_2O_3$   $[M+H]^+$  233.0926, found 233.0923.

### Compound 7f

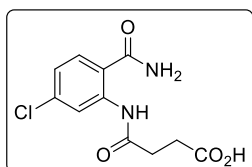

According to the procedure described in the literature,<sup>[1]</sup> in a flask equipped with a condenser, 2-amino-4-chlorobenzamide (1.7 g, 10 mmol, 1 equiv) and succinic anhydride (1 g, 10 mmol, 1 equiv) were mixed in 12.5 ml of toluene. The suspension was vigorously refluxed for 3 h and then cooled to RT. The resulting white solid was filtered, washed with Et<sub>2</sub>O and dried (2.54 g, 94%).  $R_f$  = 0.10 (MeOH/CH<sub>2</sub>Cl<sub>2</sub> 10:90); **mp** 232-234 °C; **<sup>1</sup>H NMR** (400 MHz, DMSO- $d_6$ )  $\delta$  (ppm): 12.22 (bs, 1H), 11.90 (s, 1H), 8.57 (d,  $J$  = 2.2 Hz, 1H), 8.35 (s, 1H), 7.84 (s, 1H), 7.83 (d,  $J$  = 8.6

Hz, 1H), 7.20 (dd,  $J = 8.5, 2.2$  Hz, 1H), 2.59-2.52 (m, 4H);  $^{13}\text{C}$  NMR (100 MHz, DMSO- $d_6$ )  $\delta$  (ppm): 173.6, 170.5, 170.0, 141.0, 136.7, 130.4, 122.0, 119.3, 117.7, 32.1, 28.6; HRMS calcd for  $\text{C}_{11}\text{H}_{12}\text{ClN}_2\text{O}_4$   $[\text{M}+\text{H}]^+$  271.0486, found 271.0483.

### Compound 8f

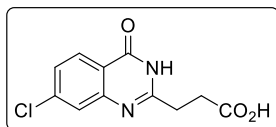

According to the procedure described in the literature,<sup>[1]</sup> in a flask equipped with a condenser, compound **M** (2.44 g, 9 mmol, 1 equiv) was dissolved in an aqueous 2N NaOH solution (15 ml, 3.3 equiv). The resulting solution was refluxed for 2 h and then cooled to RT. The pH was carefully adjusted to pH 5-6 with aqueous 3N HCl solution under vigorous stirring. The resulting orange powder was filtered, washed with water and then dried (2.28 g, quant.).  $R_f = 0.50$  (MeOH/ $\text{CH}_2\text{Cl}_2$  15:85); mp 268-270 °C;  $^1\text{H}$  NMR (400 MHz, DMSO- $d_6$ )  $\delta$  (ppm): 12.39 (bs, 1H), 8.06 (d,  $J = 8.4$  Hz, 1H), 7.61 (s, 1H), 7.49 (d,  $J = 8.4$  Hz, 1H), 2.84 (t,  $J = 6.8$  Hz, 2H), 2.74 (t,  $J = 6.8$  Hz, 2H);  $^{13}\text{C}$  NMR (100 MHz, DMSO- $d_6$ )  $\delta$  (ppm): 173.6, 161.2, 158.2, 149.8, 139.0, 127.9, 126.4, 126.0, 119.8, 29.8, 29.2; HRMS calcd for  $\text{C}_{11}\text{H}_{10}\text{ClN}_2\text{O}_3$   $[\text{M}+\text{H}]^+$  253.0380, found 253.0374.

### Compound 7g

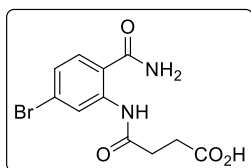

According to the procedure described in the literature,<sup>[1]</sup> in a flask equipped with a condenser, 2-amino-4-bromobenzamide (3.67 mmol, 1 equiv) and succinic anhydride (3.67 mmol, 1 equiv) were mixed in 4.6 ml of toluene. The suspension was vigorously refluxed for 12 h and then cooled to RT. The resulting white solid was filtered, washed with  $\text{Et}_2\text{O}$  and dried (1.07 g, 93%).  $^1\text{H}$  NMR (500 MHz, DMSO- $d_6$ )  $\delta$  (ppm): 12.27 (bs, 1H), 11.87 (s, 1H), 8.72 (s, 1H), 8.37 (s, 1H), 7.87 (s, 1H), 7.76 (d,  $J = 8.2$  Hz, 1H), 7.33 (d,  $J = 8.2$  Hz, 1H), 2.59-2.51 (m, 4H);  $^{13}\text{C}$  NMR (100 MHz, DMSO- $d_6$ )  $\delta$  (ppm): 174.1, 171.0, 170.5, 141.4, 130.9, 126.0, 125.4, 122.6, 118.5, 32.5, 29.0.

### Compound 8g

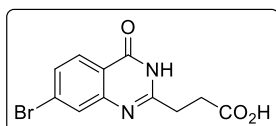

According to the procedure described in the literature,<sup>[1]</sup> in a flask equipped with a condenser, compound **7g** (0.5 g, 1.59 mmol, 1 equiv) was dissolved in an aqueous 2N NaOH solution (2.7 ml, 3.3 equiv). The resulting solution was refluxed for 2 h and then cooled to RT. The pH was carefully adjusted to pH 5-6 with aqueous 3N HCl solution under vigorous stirring. The resulting orange powder was filtered, washed with water and then dried (430mg, 91.2%).  $R_f = 0.50$  (MeOH/ $\text{CH}_2\text{Cl}_2$  15:85); mp 268-270 °C;  $^1\text{H}$  NMR (400 MHz, DMSO- $d_6$ )  $\delta$  (ppm): 12.39 (bs, 1H), 12.25 (bs, 1H), 7.99 (s, 1H),

7.77 (s, 1H), 7.63 (s, 1H), 2.85 (m, 2H), 2.74 (m, 2H);  $^{13}\text{C}$  NMR (100 MHz, DMSO- $d_6$ )  $\delta$  (ppm): 174.0, 161.6, 158.4, 150.3, 129.6, 129.5, 128.7, 128.3, 120.5, 30.1, 29.6.

### Compound 7h

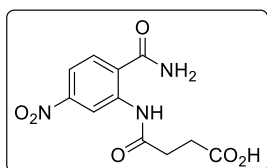

According to the procedure described in the literature,<sup>[1]</sup> in a flask equipped with a condenser, 2-amino-4-chlorobenzamide (544 mg, 3 mmol, 1 equiv) and succinic anhydride (300 mg, 3 mmol, 1 equiv) were mixed in 4 ml of toluene. The suspension was vigorously refluxed for 2 days and then cooled to RT. The resulting yellow solid was filtered, washed with Et<sub>2</sub>O and dried (2.54 g, 94%).  $R_f$  = 0.13 (MeOH/CH<sub>2</sub>Cl<sub>2</sub> 10:90); mp 207-209 °C;  $^1\text{H}$  NMR (400 MHz, DMSO- $d_6$ )  $\delta$  (ppm): 12.26 (bs, 1H), 11.61 (s, 1H), 9.28 (d,  $J$  = 2.3 Hz, 1H), 8.56 (s, 1H), 8.10 (s, 1H), 8.00 (d,  $J$  = 8.7 Hz, 1H), 7.95 (dd,  $J$  = 8.7, 2.3 Hz, 1H), 2.63 (t,  $J$  = 6.4 Hz, 2H), 2.55 (t,  $J$  = 6.4 Hz, 2H);  $^{13}\text{C}$  NMR (100 MHz, DMSO- $d_6$ )  $\delta$  (ppm): 173.6, 170.9, 169.1, 149.1, 140.1, 130.1, 125.1, 116.7, 114.4, 32.1, 28.6; HRMS calcd for C<sub>11</sub>H<sub>12</sub>N<sub>3</sub>O<sub>6</sub> [M+H]<sup>+</sup> 282.0726, found 282.0723.

### Compound 8h

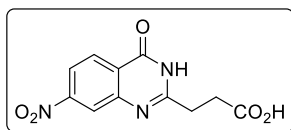

According to the procedure described in the literature,<sup>[1]</sup> in a flask equipped with a condenser, compound **Q** (655 mg, 2.3 mmol, 1 equiv) was dissolved in an aqueous 2N NaOH solution (4 ml, 3.3 equiv). The resulting solution was refluxed for 5 h and then cooled to RT. The pH was carefully adjusted to pH 5-6 with aqueous 3N HCl solution under vigorous stirring. The resulting orange powder was filtered, washed with water and then dried (527 mg, 86%).  $R_f$  = 0.50 (MeOH/CH<sub>2</sub>Cl<sub>2</sub> 15:85); mp 261-263 °C;  $^1\text{H}$  NMR (400 MHz, DMSO- $d_6$ )  $\delta$  (ppm): 12.61 (bs, 1H), 12.34 (bs, 1H), 8.24 (d,  $J$  = 8.6 Hz, 1H), 8.19 (d,  $J$  = 1.6 Hz, 1H), 8.13 (dd,  $J$  = 8.6, 1.8 Hz, 1H), 2.88 (t,  $J$  = 6.8 Hz, 2H), 2.76 (t,  $J$  = 6.7 Hz, 2H);  $^{13}\text{C}$  NMR (100 MHz, DMSO- $d_6$ )  $\delta$  (ppm): 173.8, 160.9, 159.2, 151.3, 149.2, 128.3, 125.3, 121.9, 119.9, 29.9, 29.4; HRMS calcd for C<sub>11</sub>H<sub>10</sub>N<sub>3</sub>O<sub>5</sub> [M+H]<sup>+</sup> 264.0620, found 264.0619.

## 2. Additional references

[1] R. Ferreira de Freitas, R. J. Harding, I. Franzoni, M. Ravichandran, M. K. Mann, H. Ouyang, M. Lautens, V. Santhakumar, C. H. Arrowsmith, M. Schapira, *J. Med. Chem.* **2018**, *61*, 4517-4527.

## 3. $^1\text{H}$ and $^{13}\text{C}$ NMR

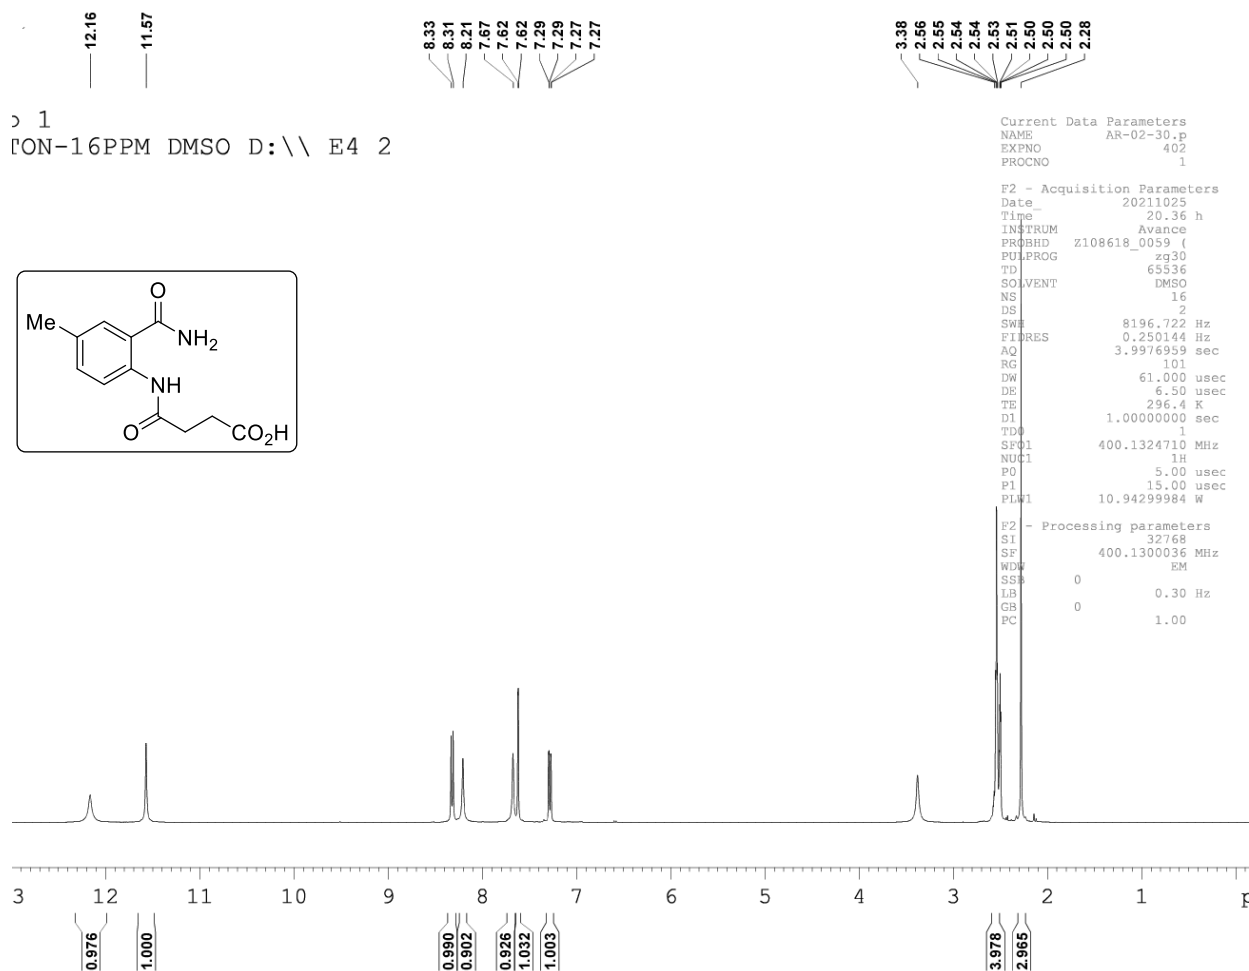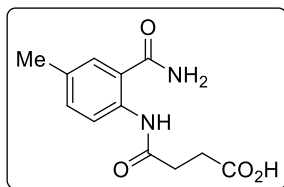

step 1  
C13-1heure-D1-2s DMSO D:\ E4 2

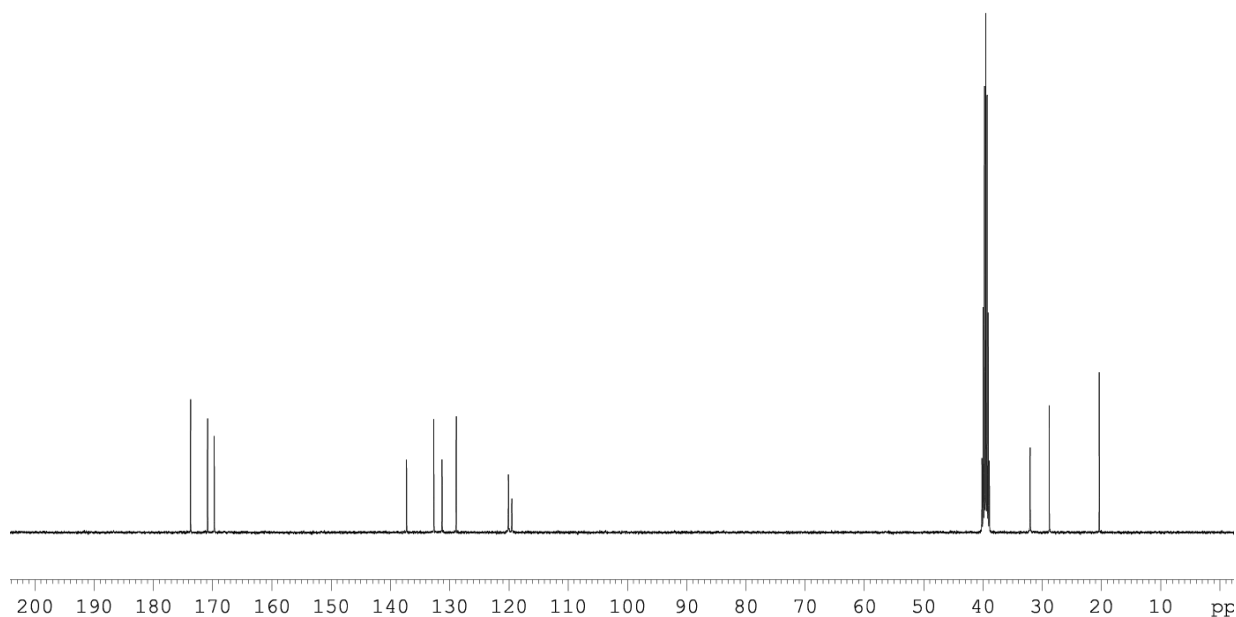



ep 2  
OTON-16PPM DMSO D:\ E4 16

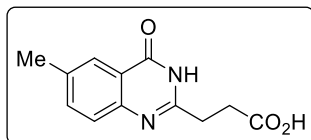

Current Data Parameters  
NAME AR-02-32.p  
EXPNO 403  
PROCNO 1

F2 - Acquisition Parameters  
Date\_ 20211026  
Time\_ 12.05 h  
INSTRUM Avance  
PROBHD Z108618\_0059 (zg30)  
PULPROG zg30  
TD 65536  
SOLVENT DMSO  
NS 16  
DS 2  
SWH 8196.722 Hz  
FIDRES 0.250144 Hz  
AQ 3.9976959 sec  
RG 101  
DW 61.000 usec  
DE 6.50 usec  
TE 295.6 K  
D1 1.00000000 sec  
TDO 1  
SFO1 400.1324710 MHz  
NUC1 1H  
P0 5.00 usec  
P1 15.00 usec  
PLW1 10.94299984 W

F2 - Processing parameters  
SI 32768  
SF 400.1300039 MHz  
WDW EM  
SSB 0  
LB 0.30 Hz  
GB 0  
PC 1.00

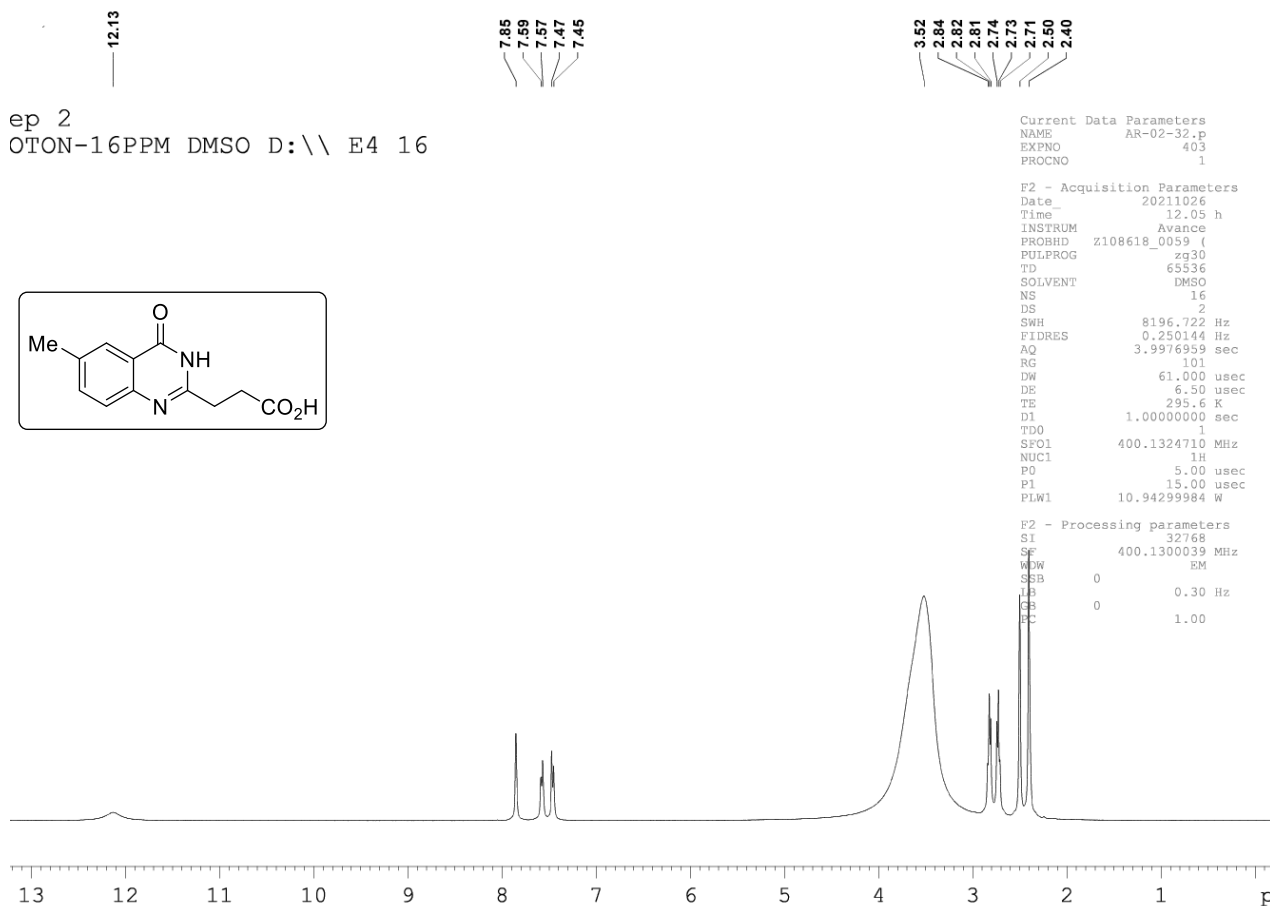

Step 2  
C13-1heure-D1-2s DMSO D:\ E4 5

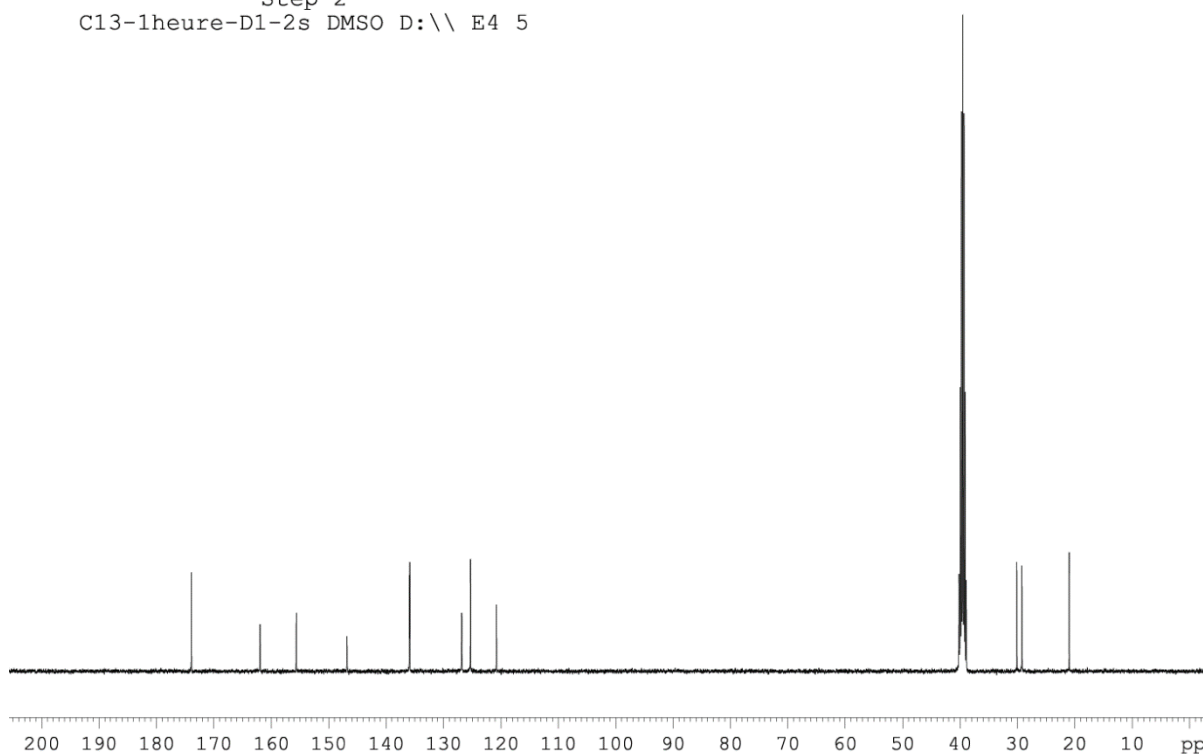

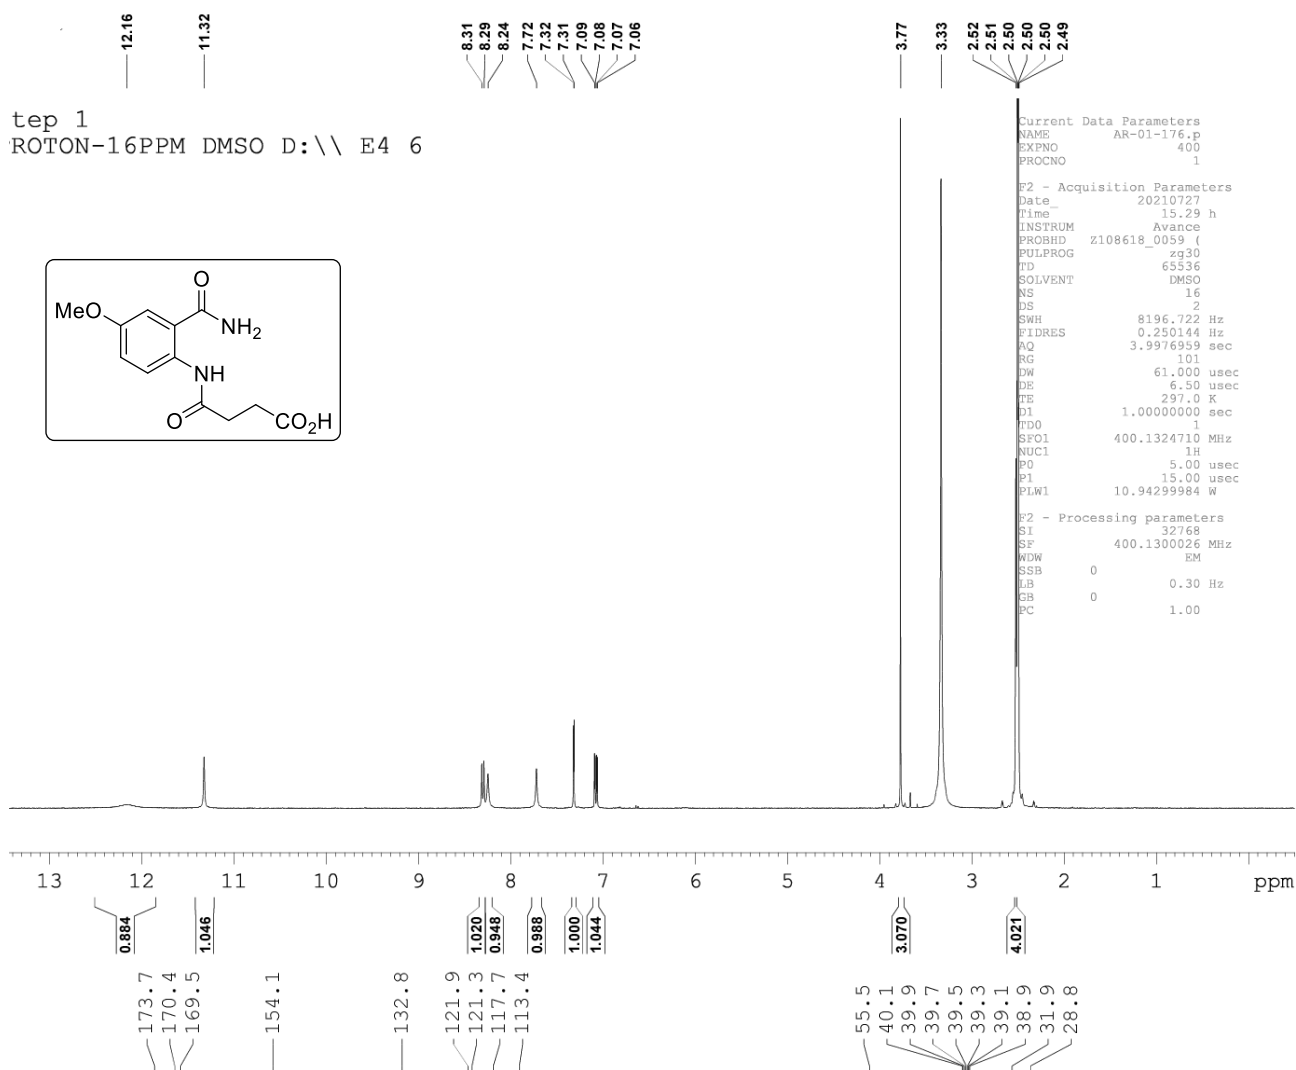

step 1  
3-1heure-D1-2s DMSO D:\ E4 16

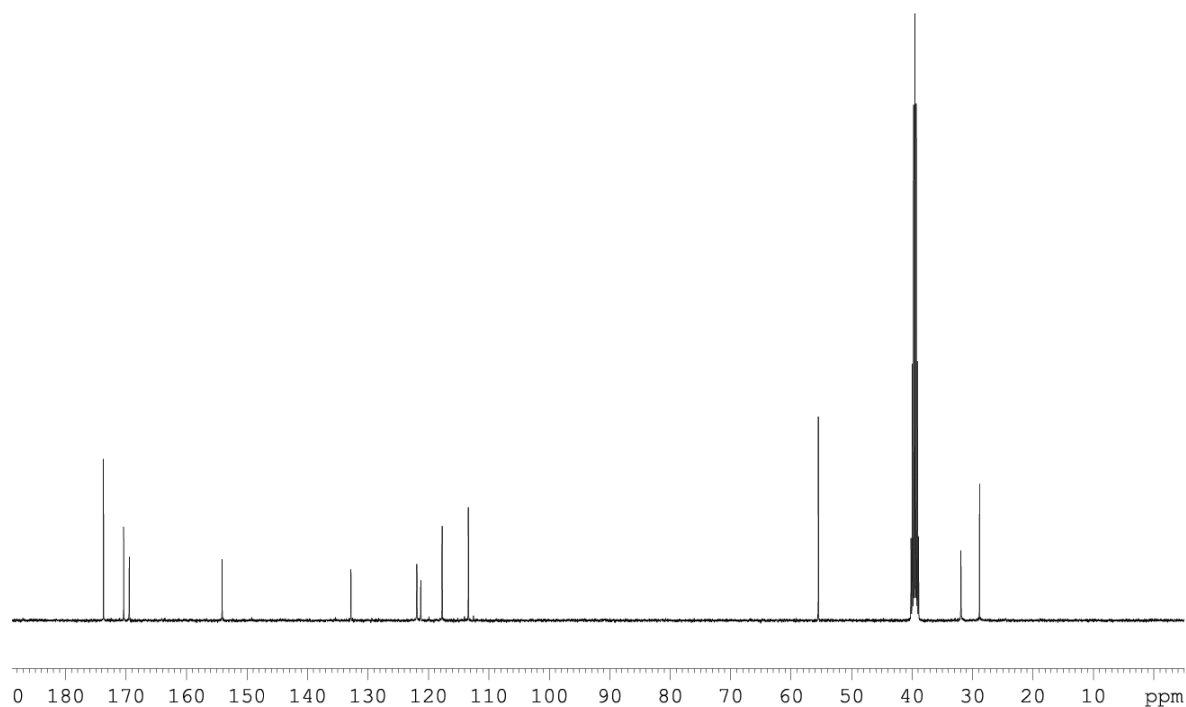

ep 2  
OTON-16PPM DMSO D:\ E4 24

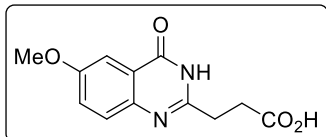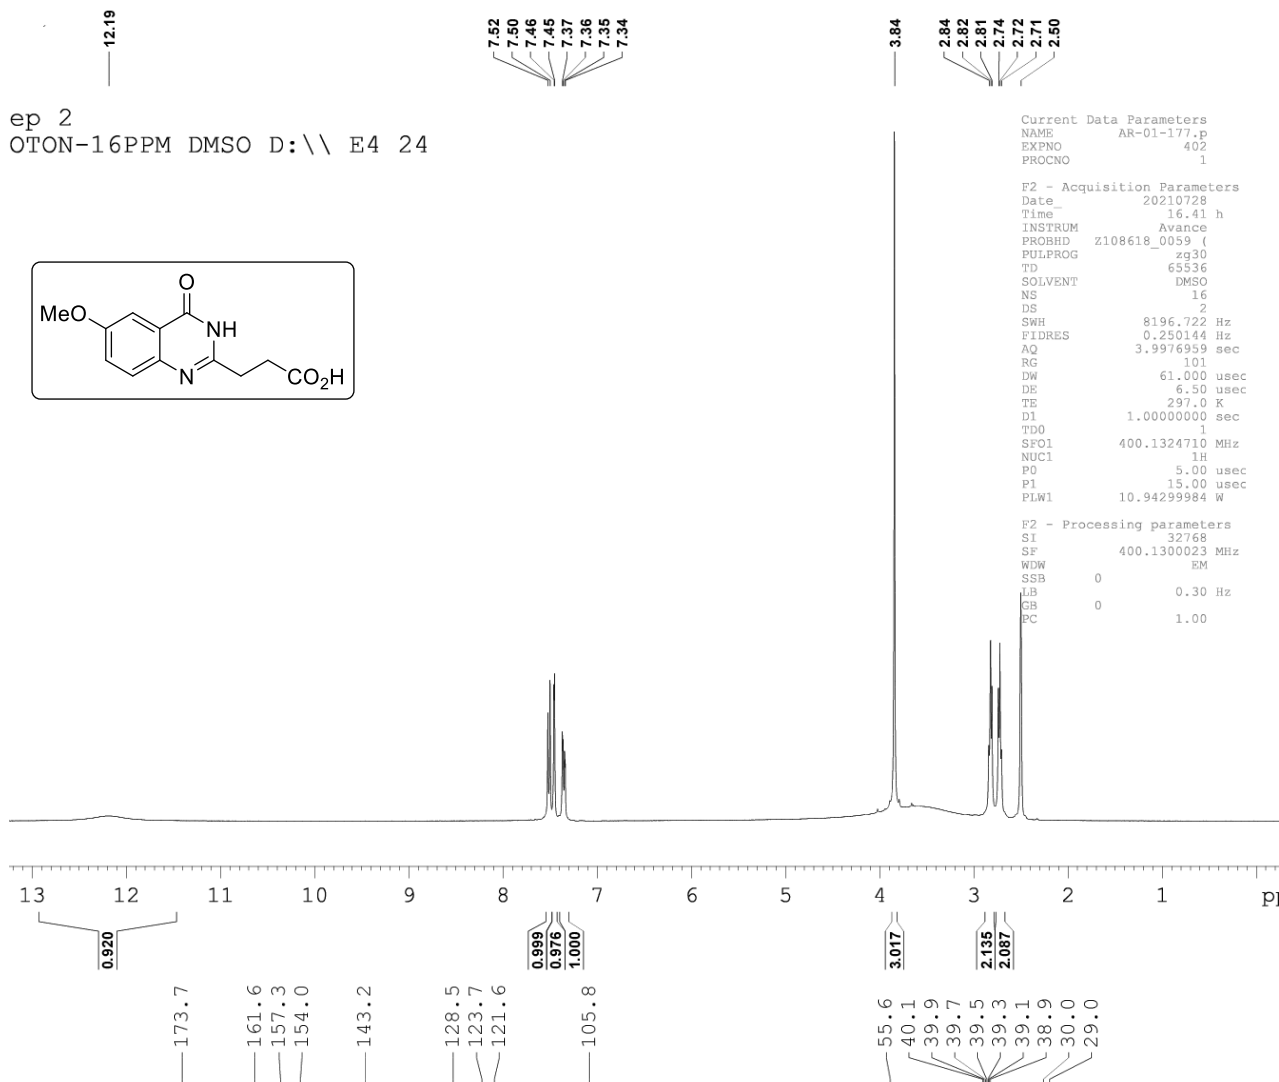

Current Data Parameters  
NAME AR-01-177.p  
EXPNO 402  
PROCNO 1

F2 - Acquisition Parameters  
Date 20210728  
Time 16.41 h  
INSTRUM Avance  
PROBHD Z108618\_0059 (4  
PULPROG zg30  
TD 65536  
SOLVENT DMSO  
NS 16  
DS 2  
SWH 8196.722 Hz  
FIDRES 0.250144 Hz  
AQ 3.9976959 sec  
RG 101  
DW 61.000 usec  
DE 6.50 usec  
TE 297.0 K  
D1 1.00000000 sec  
TD0 1  
SFO1 400.1324710 MHz  
NUC1 1H  
P0 5.00 usec  
P1 15.00 usec  
PLW1 10.94299984 W

F2 - Processing parameters  
SI 32768  
SF 400.1300023 MHz  
WDW EM  
SSB 0  
LB 0.30 Hz  
GB 0  
PC 1.00

step 2  
C13-1heure-D1-2s DMSO D:\ E4 24

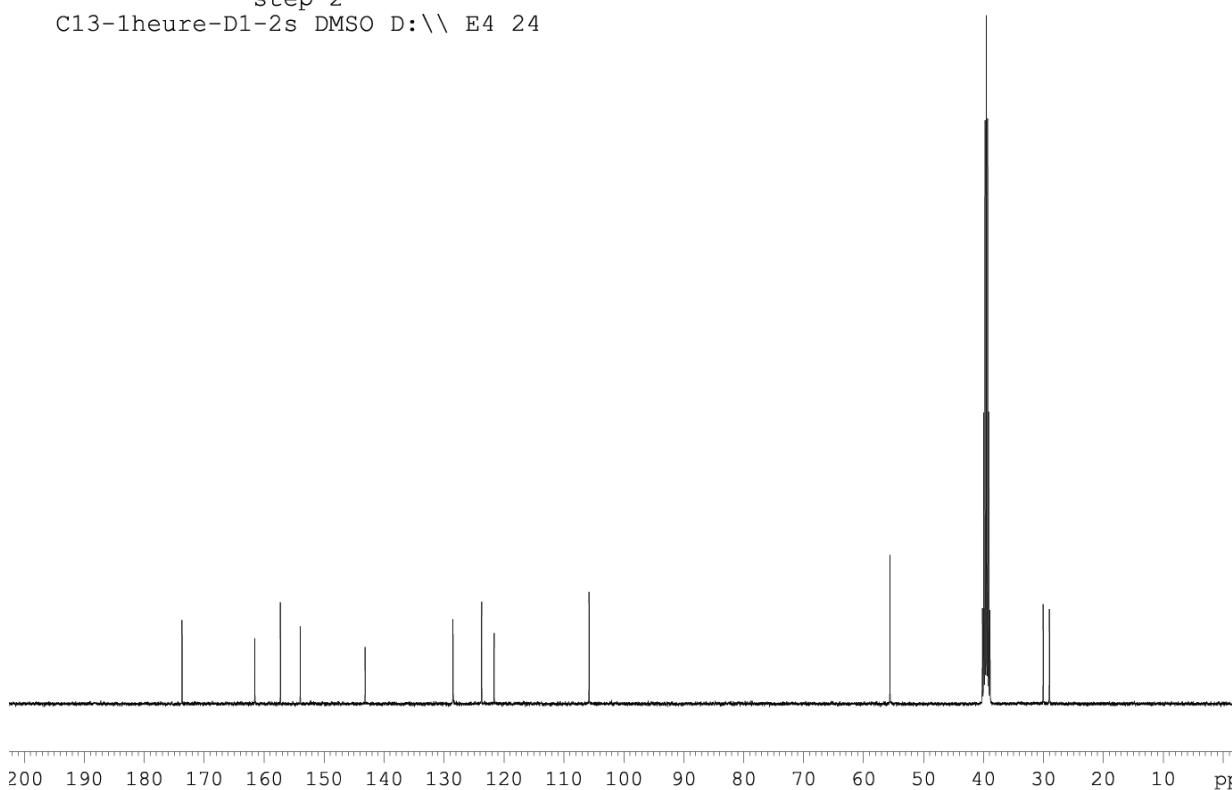

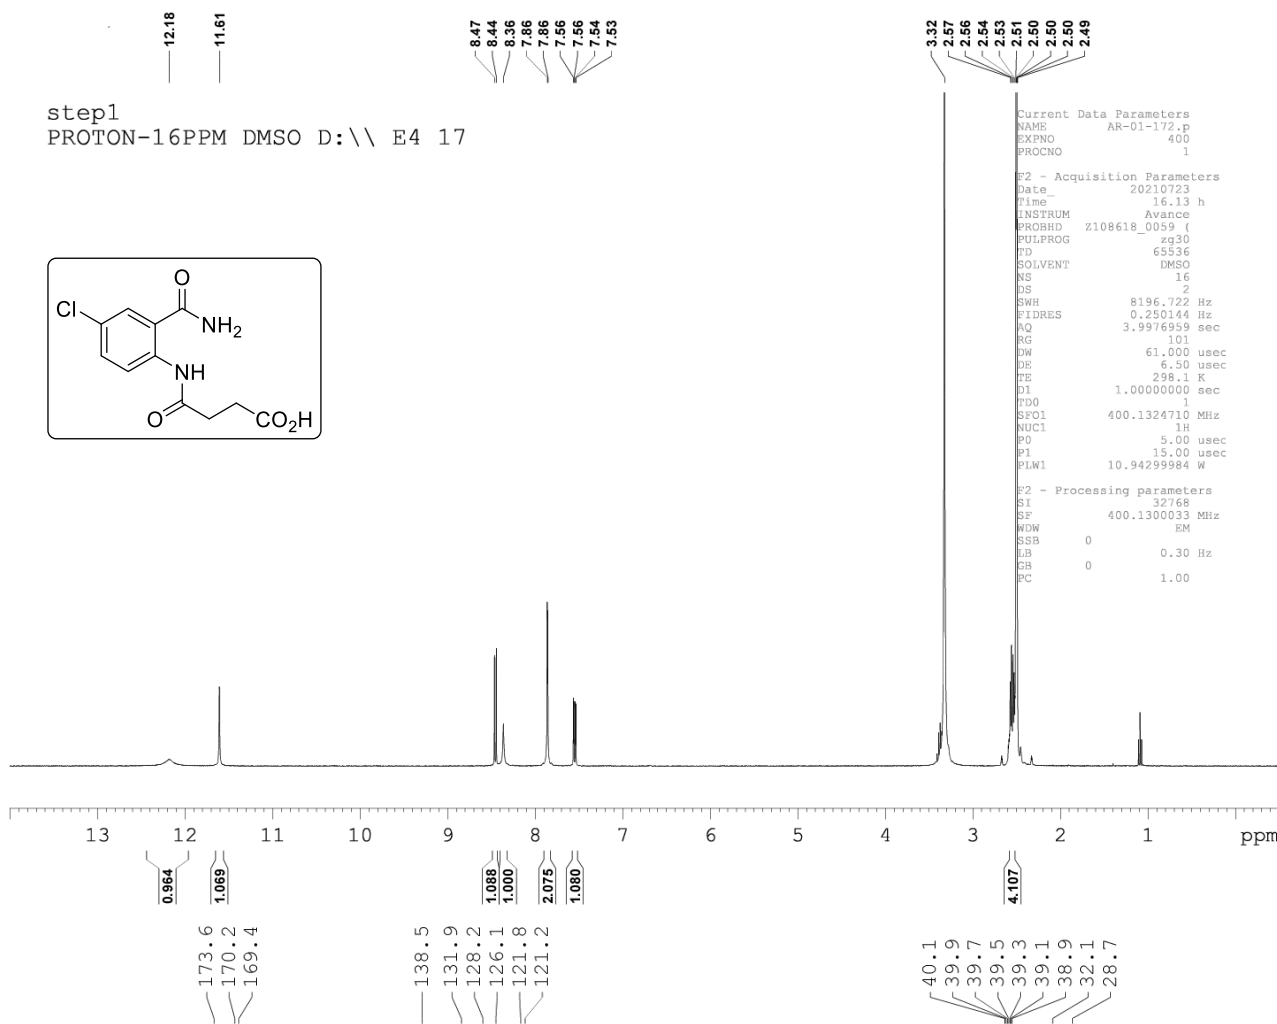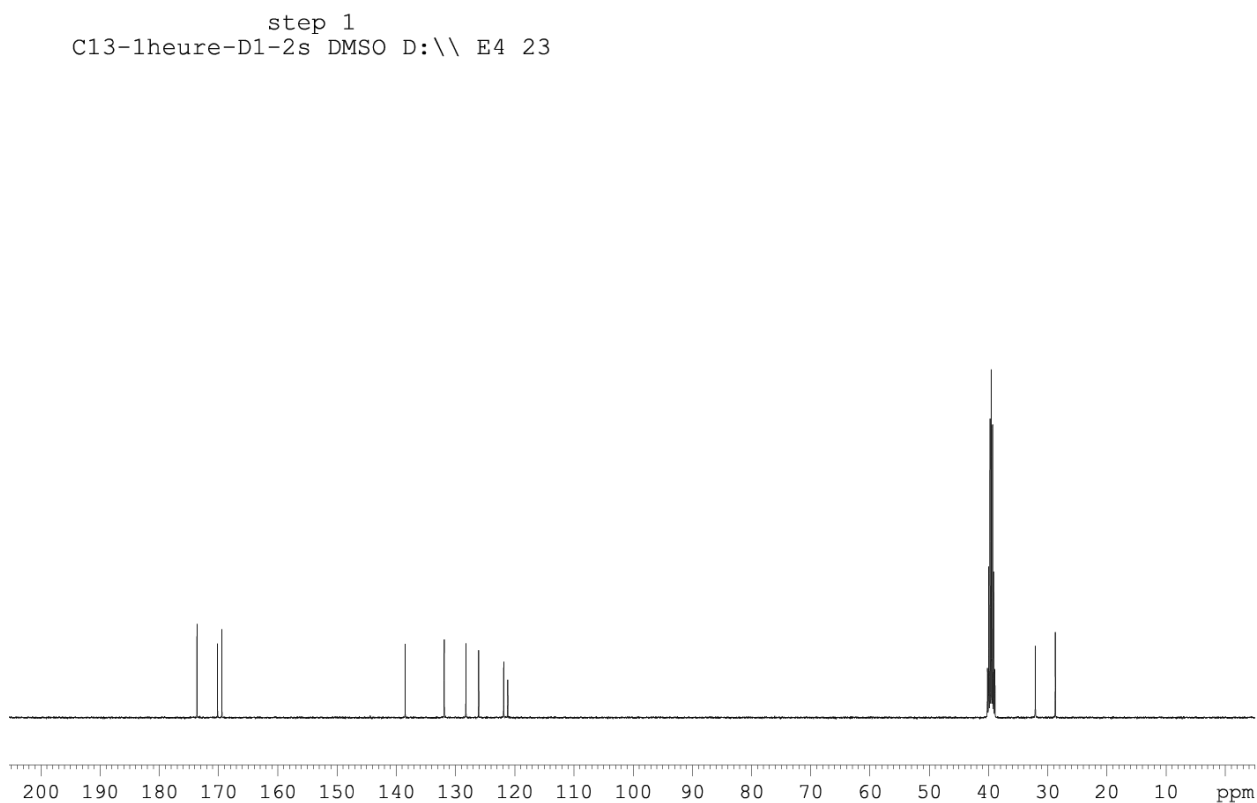

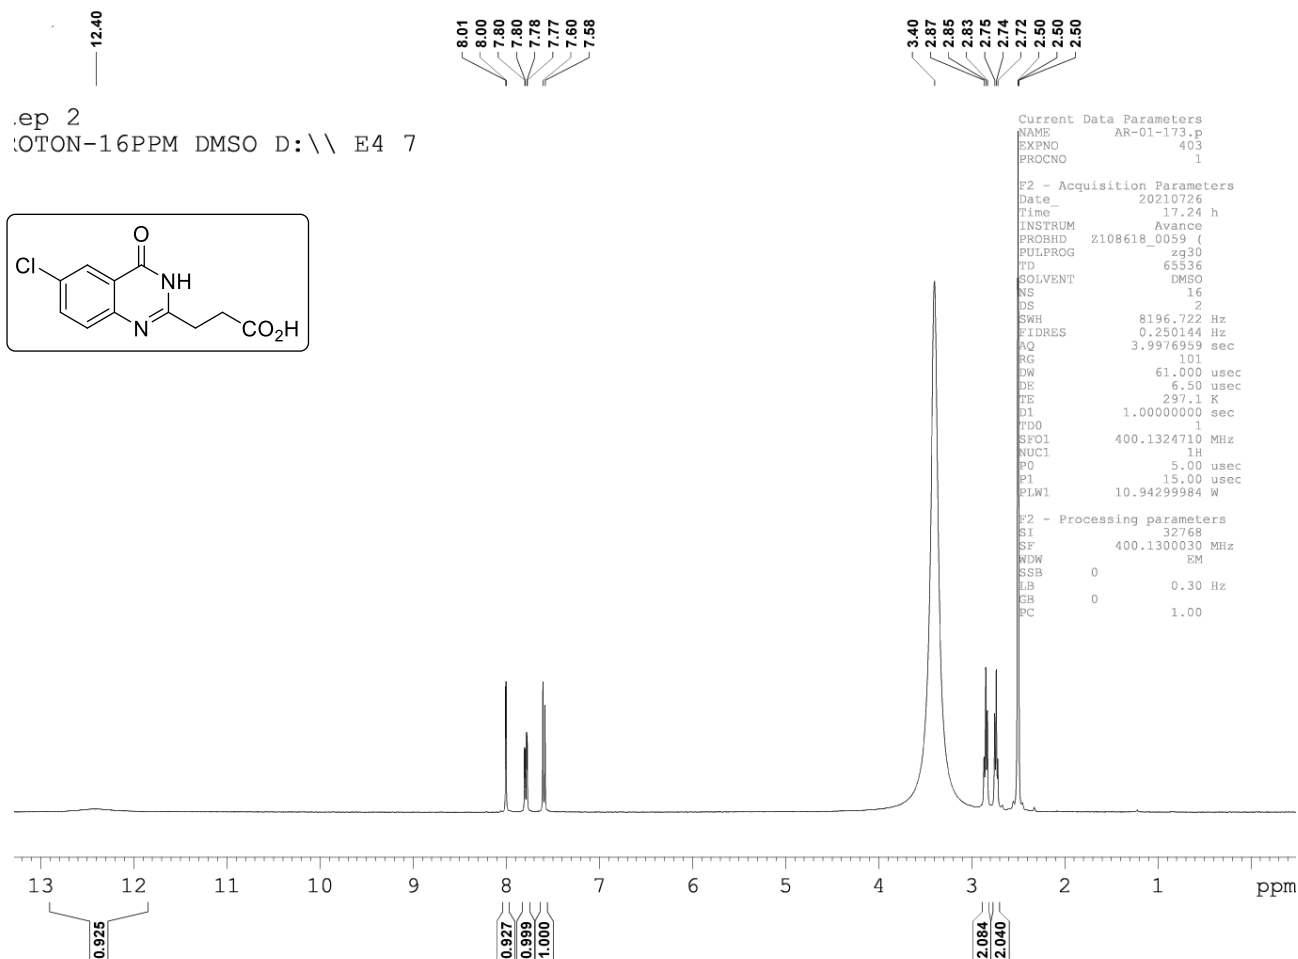

step 2  
C13-1heure-D1-2s DMSO D:\ E4 16

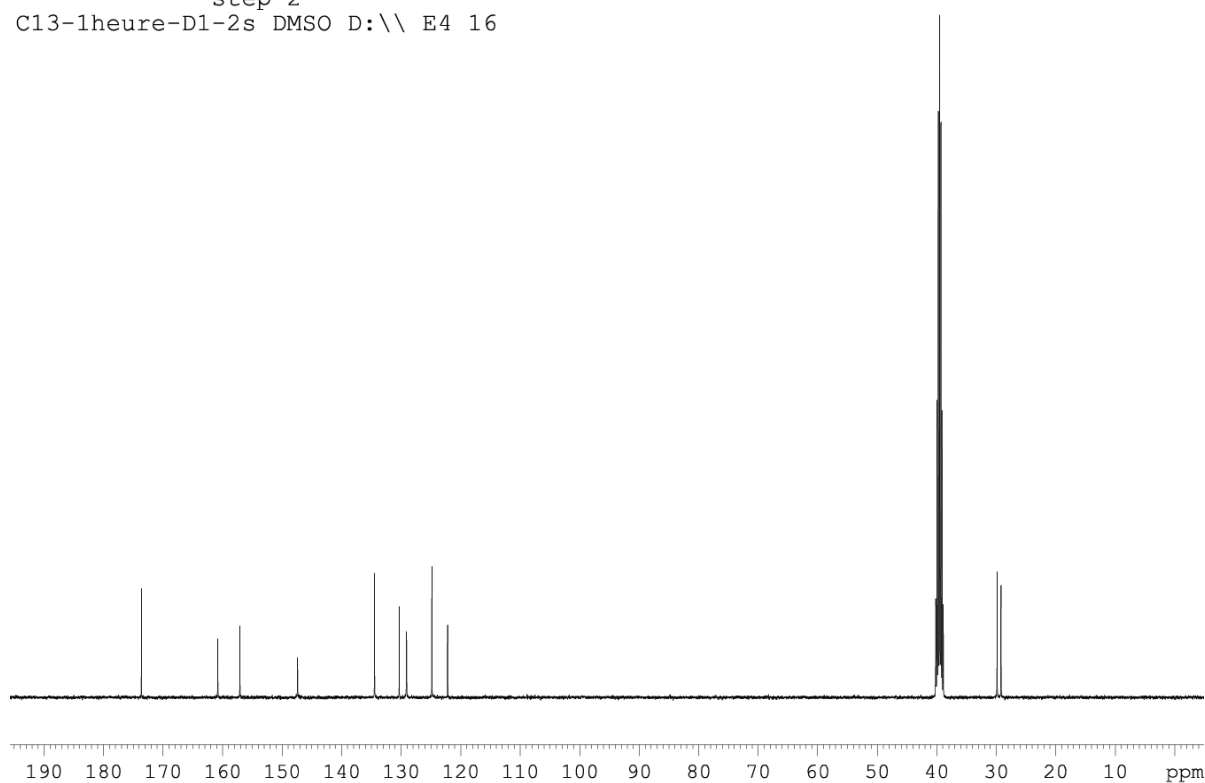

tep 1  
 ROTON-16PPM DMSO D:\ E4 8

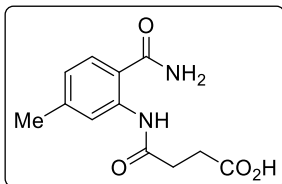

Current Data Parameters  
 NAME AR-02-41.p  
 EXPNO 400  
 PROCNO 1

F2 - Acquisition Parameters  
 Date 20211108  
 Time 15.14 h  
 INSTRUM Avance  
 PROBHD Z108618\_0059 ( )  
 PULPROG zg30  
 TD 65536  
 SOLVENT DMSO  
 NS 16  
 DS 2  
 SWH 8196.722 Hz  
 FIDRES 0.250144 Hz  
 AQ 3.9976959 sec  
 RG 101  
 DW 61.000 usec  
 DE 6.50 usec  
 TE 295.7 K  
 D1 1.00000000 sec  
 TDD 1  
 SFO1 400.1324710 MHz  
 NUC1 1H  
 FO 5.00 usec  
 P1 15.00 usec  
 PL1 10.94299984 W

F2 - Processing parameters  
 SI 32768  
 SF 400.1300026 MHz  
 WDW EM  
 SSB 0  
 LB 0.30 Hz  
 GB 0  
 PC 1.00

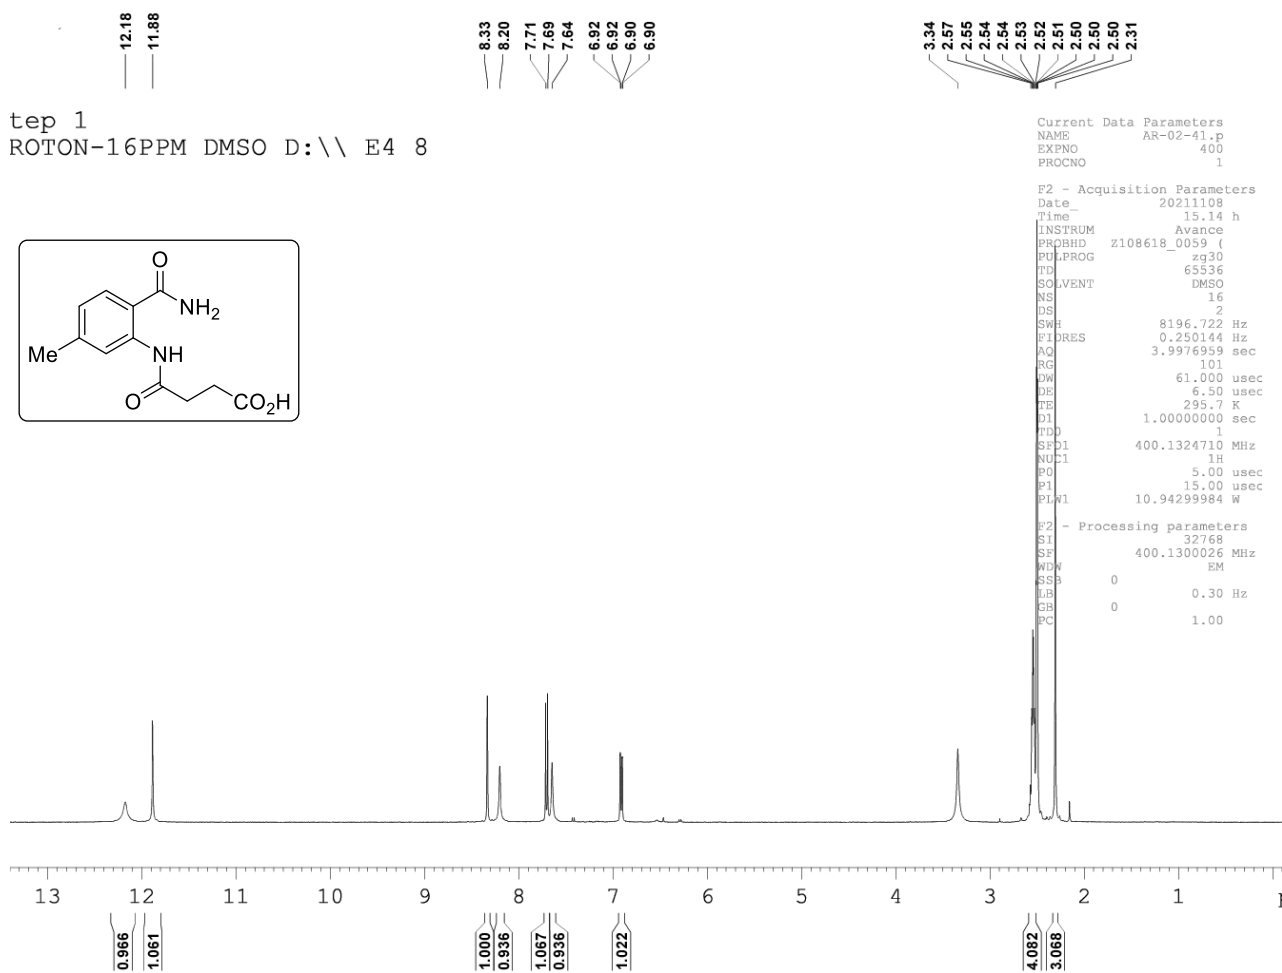

Step 1  
 C13-1heure-D1-2s DMSO D:\ E4 12

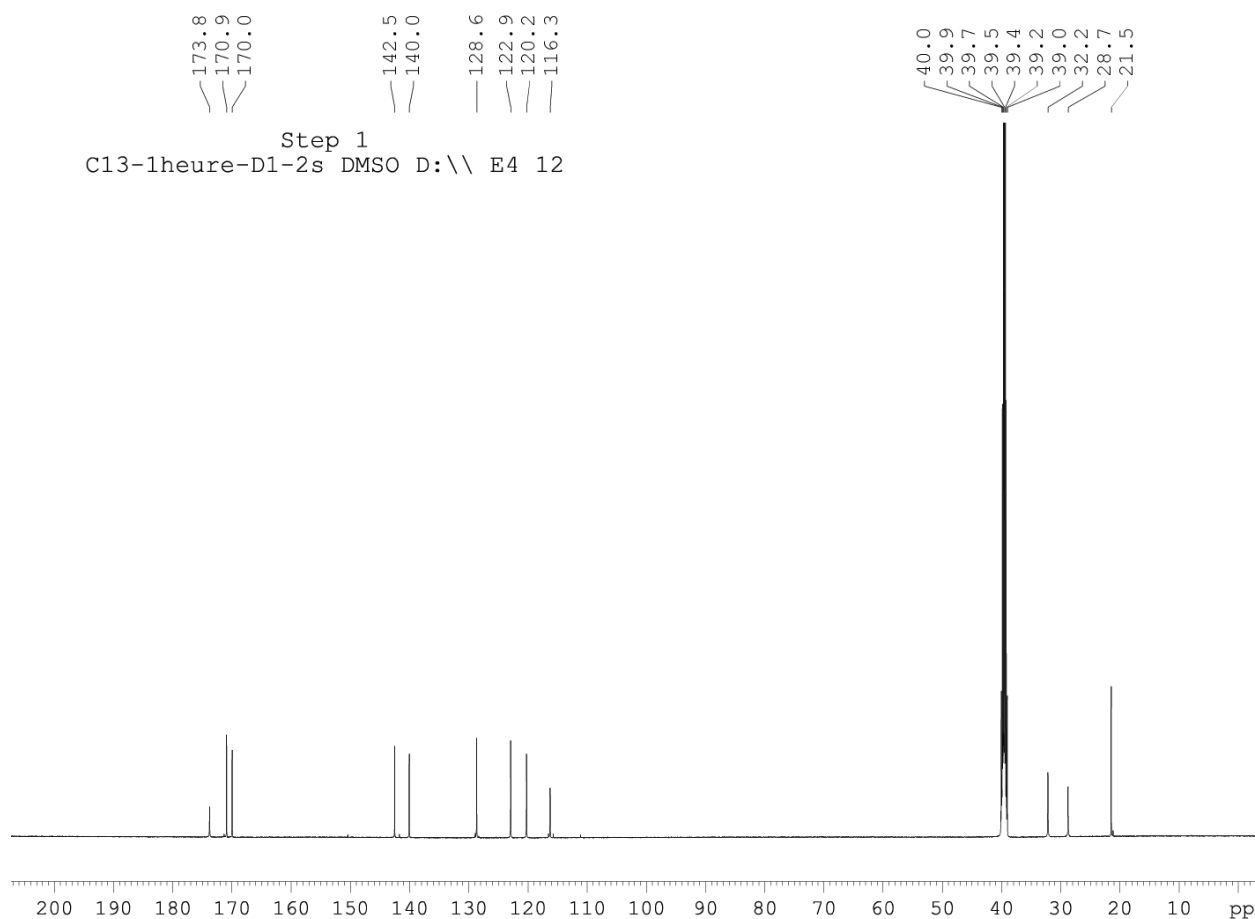

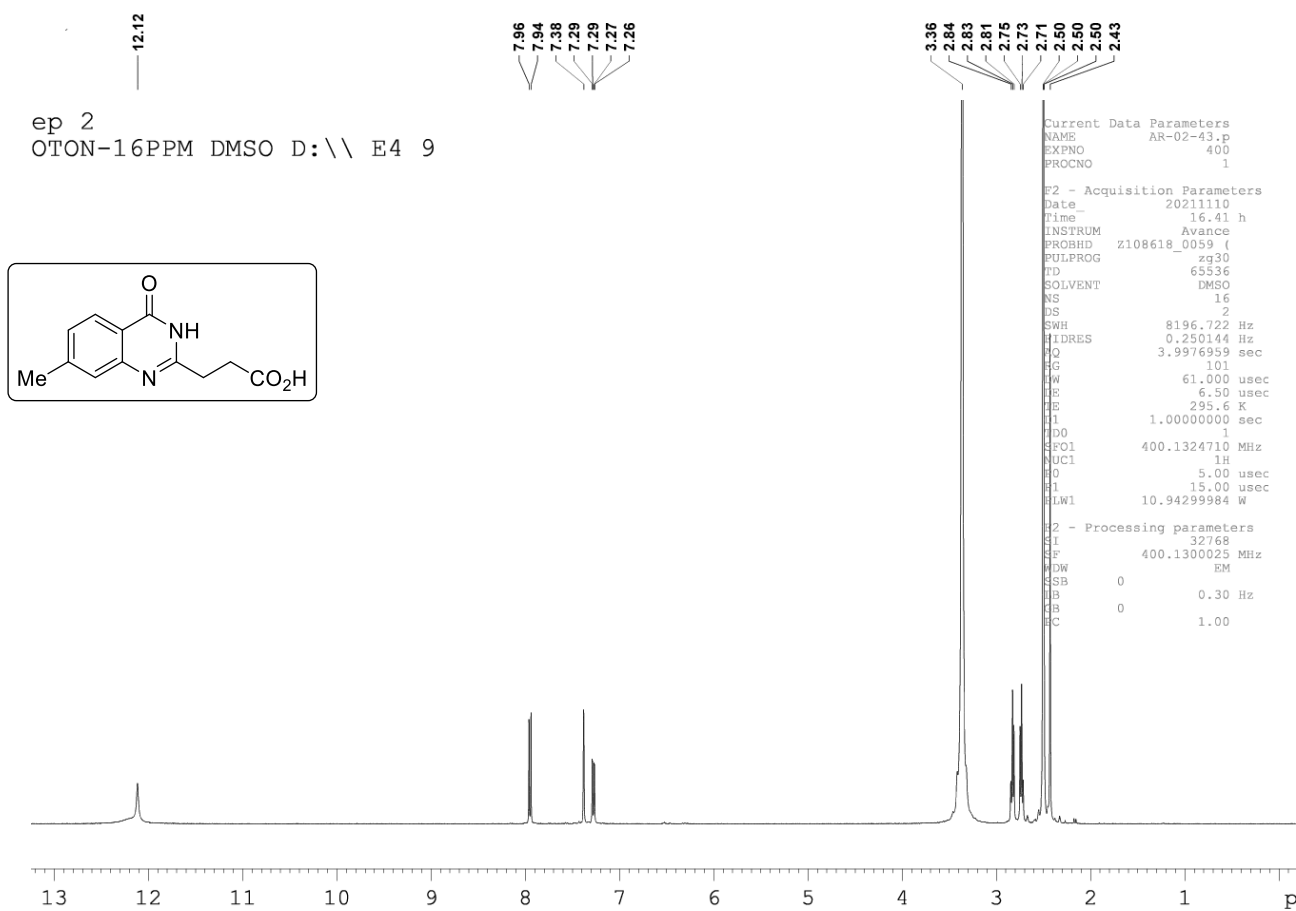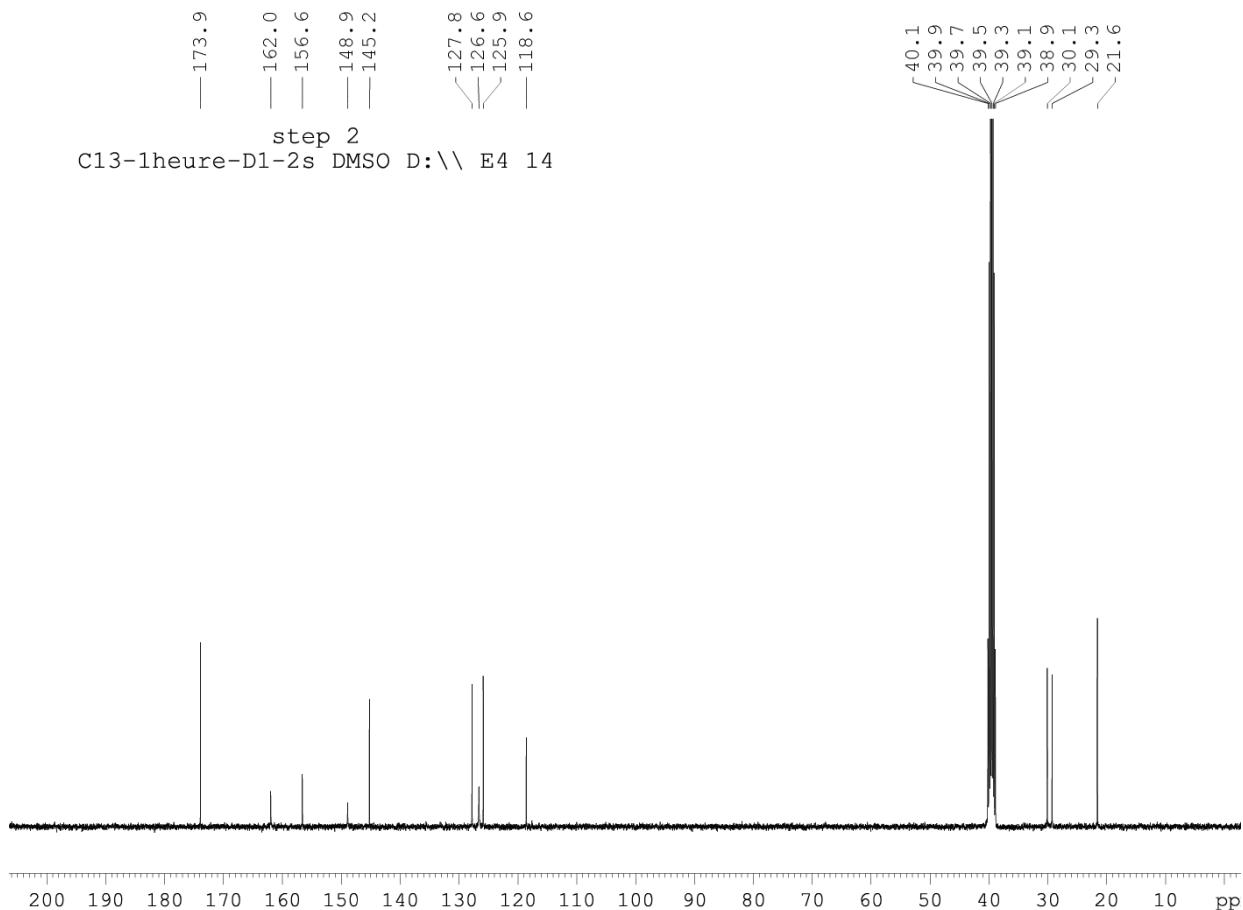

step 1  
PROTON-16PPM DMSO D:\ E4 18

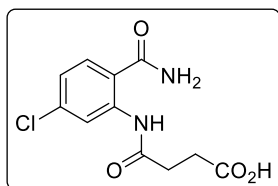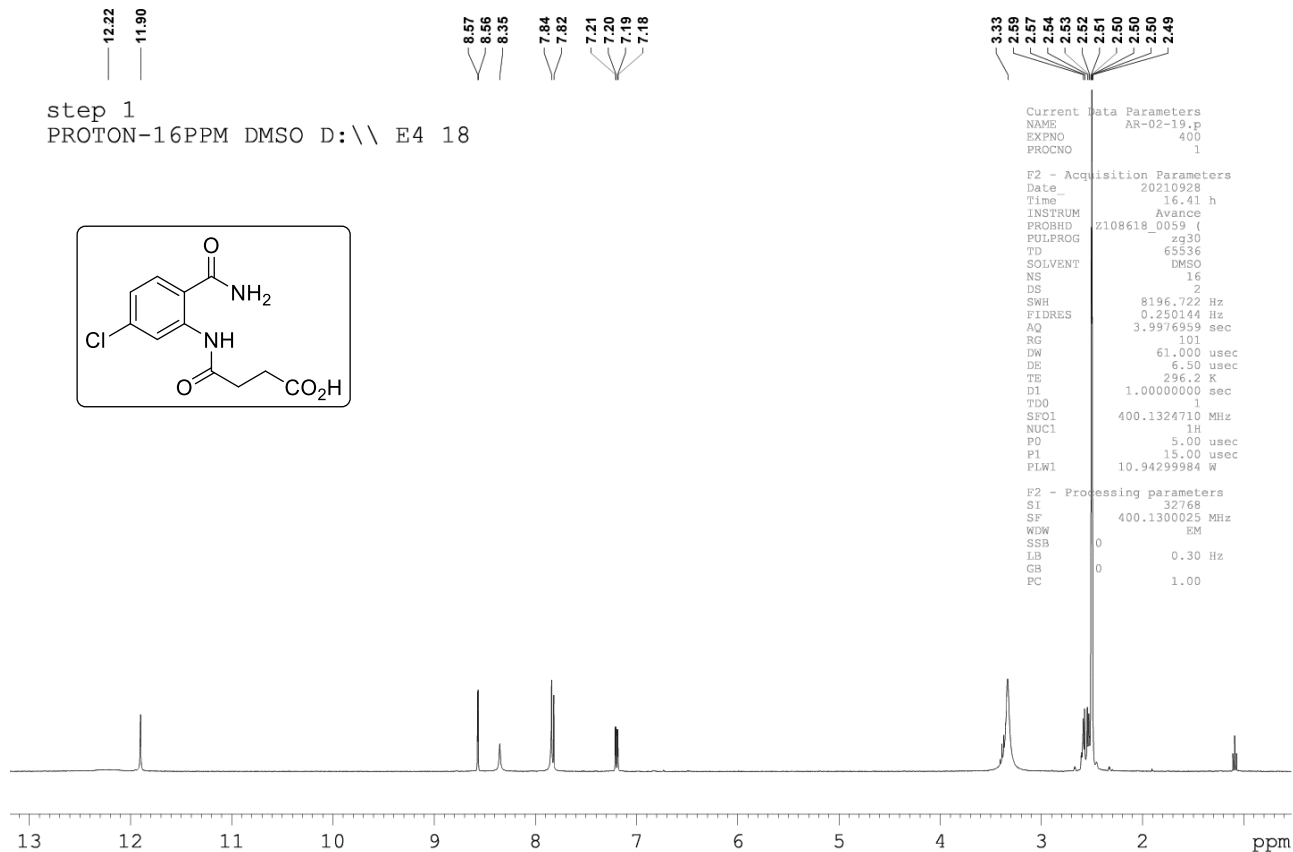

step 1  
C13-1heure-D1-2s DMSO D:\ E4 4

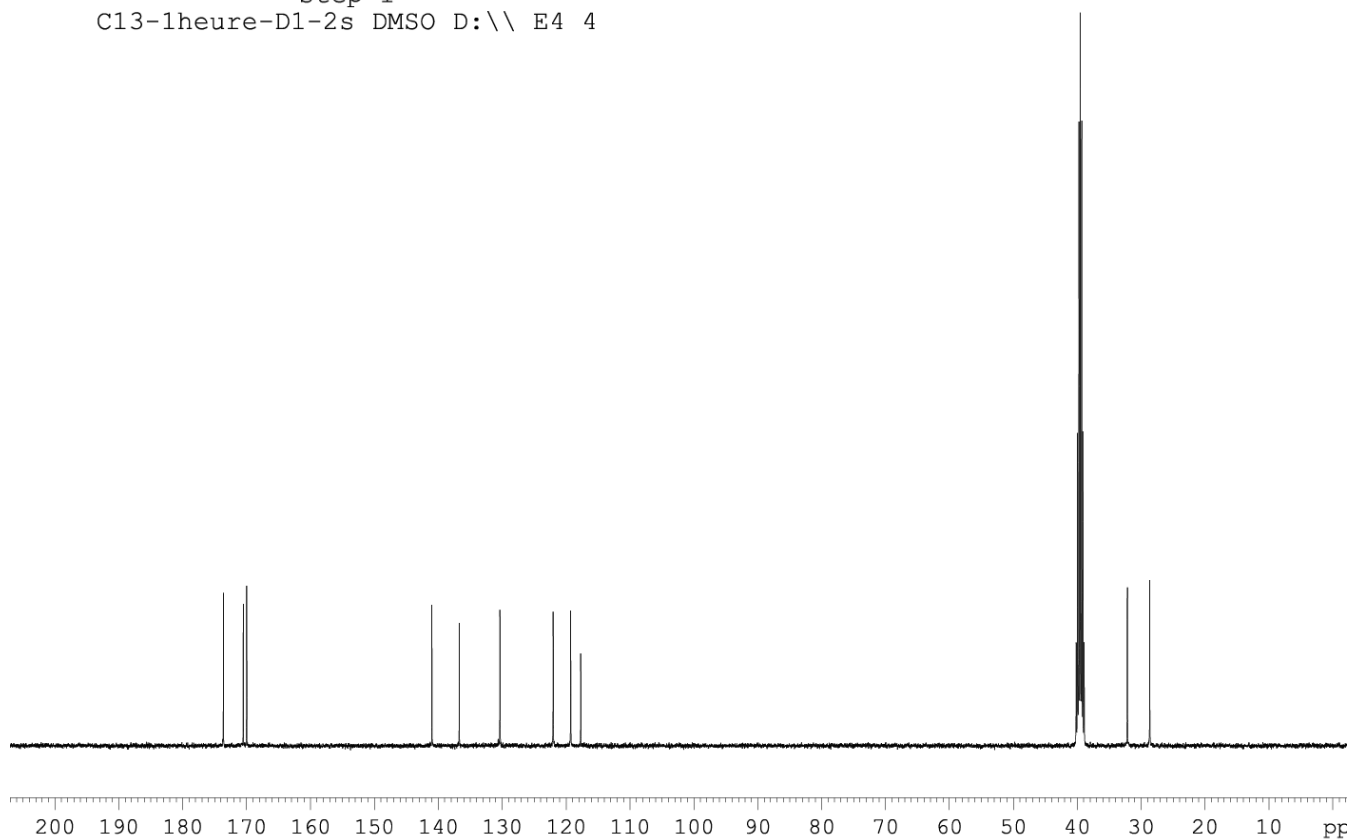



ep 2  
OTON-16PPM DMSO D:\ E4 5

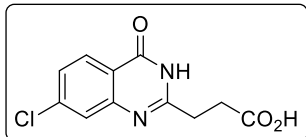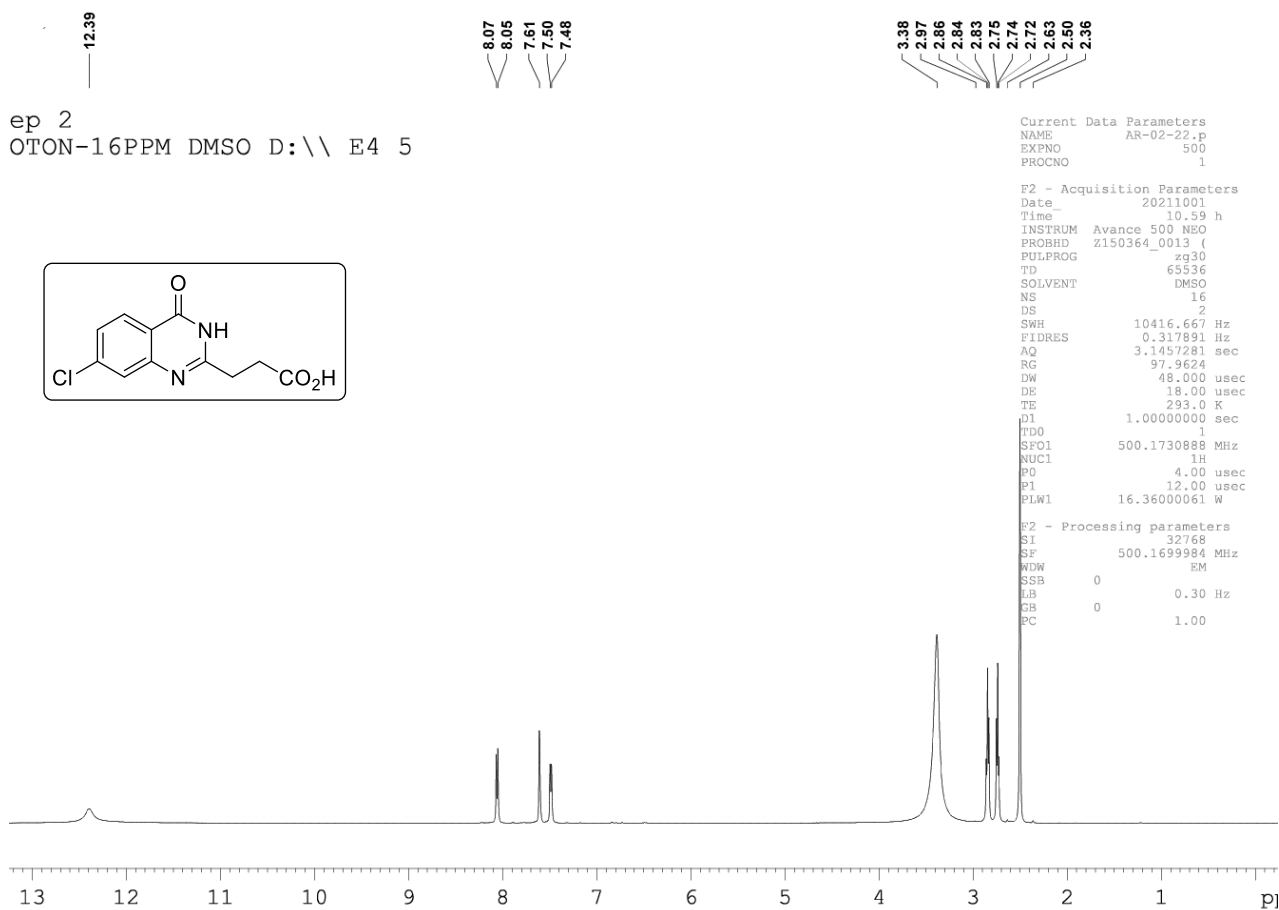

Current Data Parameters  
NAME AR-02-22.p  
EXPNO 500  
PROCNO 1

F2 - Acquisition Parameters  
Date 20211001  
Time 10.59 h  
INSTRUM Avance 500 NEO  
PROBHD Z150364\_0013 (PULPROG zg30)  
TD 65536  
SOLVENT DMSO  
NS 16  
DS 2  
SWH 10416.667 Hz  
FIDRES 0.317891 Hz  
AQ 3.1457281 sec  
RG 97.9624  
DW 48.000 usec  
DE 18.00 usec  
TE 293.0 K  
D1 1.00000000 sec  
TD0 1  
SFO1 500.1730888 MHz  
NUC1 1H  
P0 4.00 usec  
P1 12.00 usec  
PLW1 16.36000061 W

F2 - Processing parameters  
SI 32768  
SF 500.1699984 MHz  
WDW EM  
SSB 0  
LB 0.30 Hz  
GB 0  
EC 1.00

step 2  
C13-1heure-D1-2s DMSO D:\ E4 2

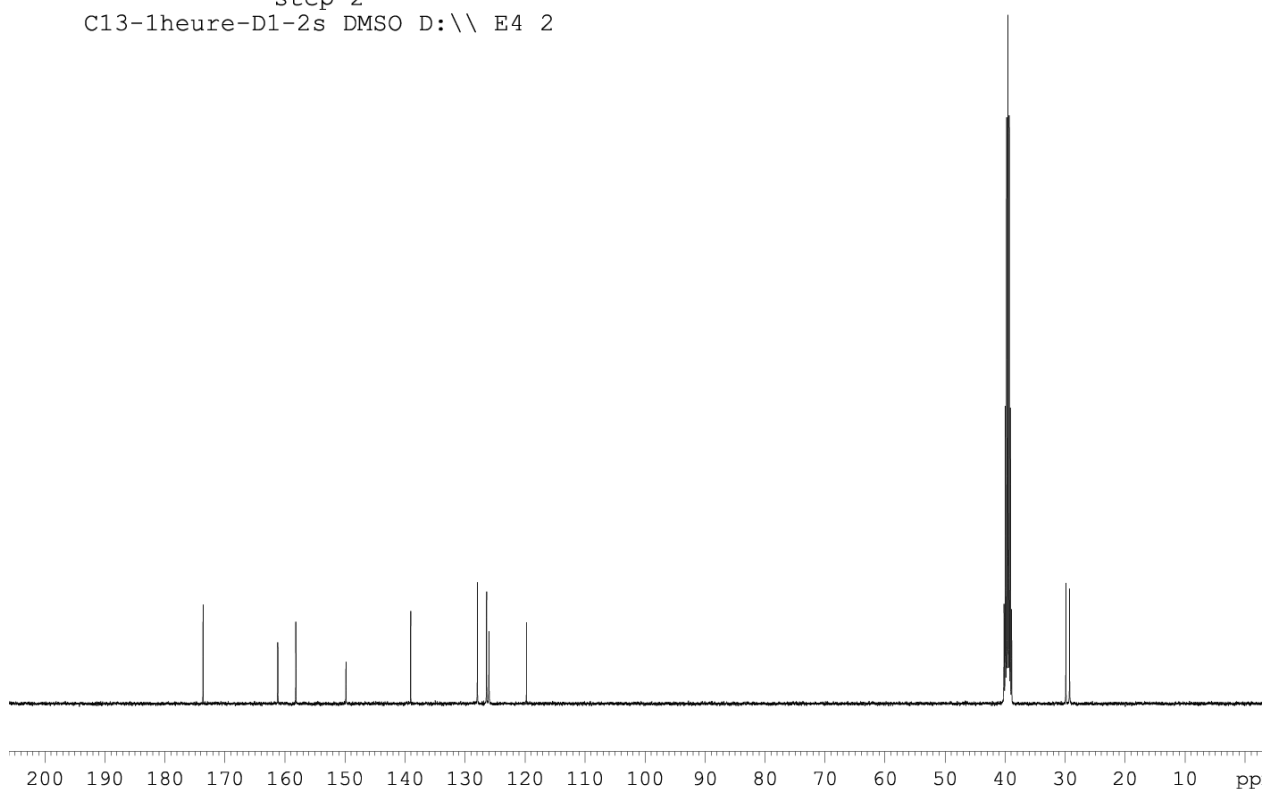

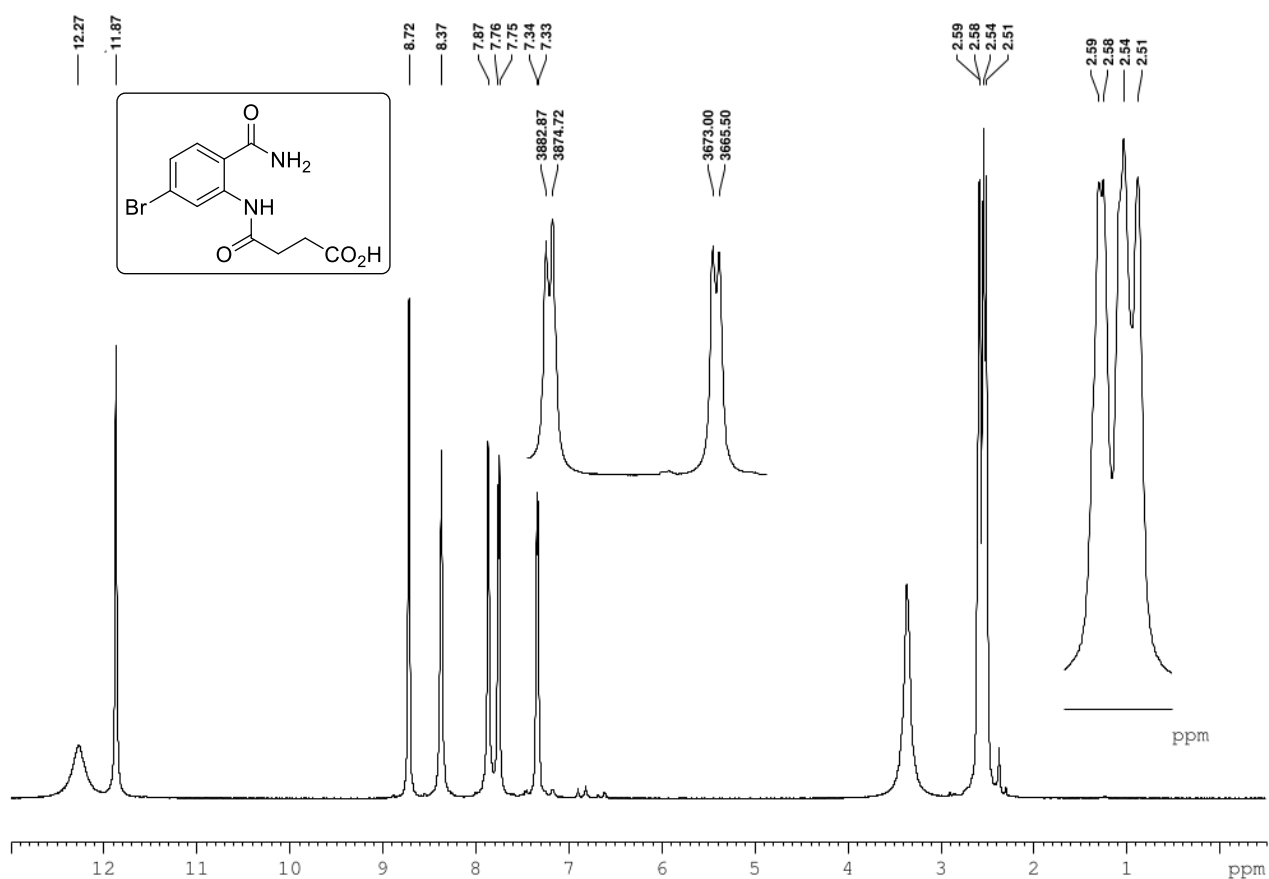

C13-1heure-D1-5s DMSO D:\ E4 1

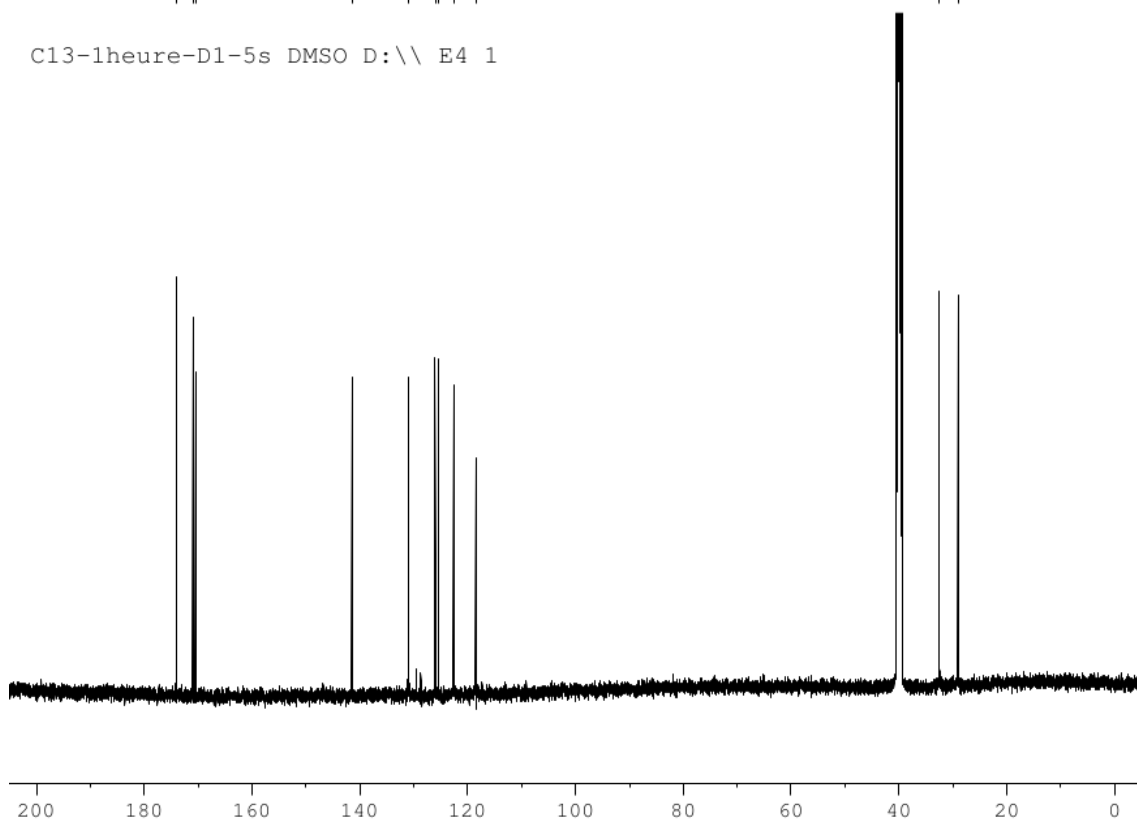

12.39  
12.25

7.99  
7.77  
7.63

2.85  
2.74

PROTON-16PPM DMSO D:\ E4 21

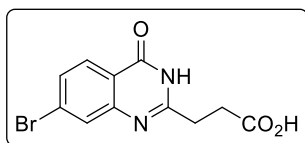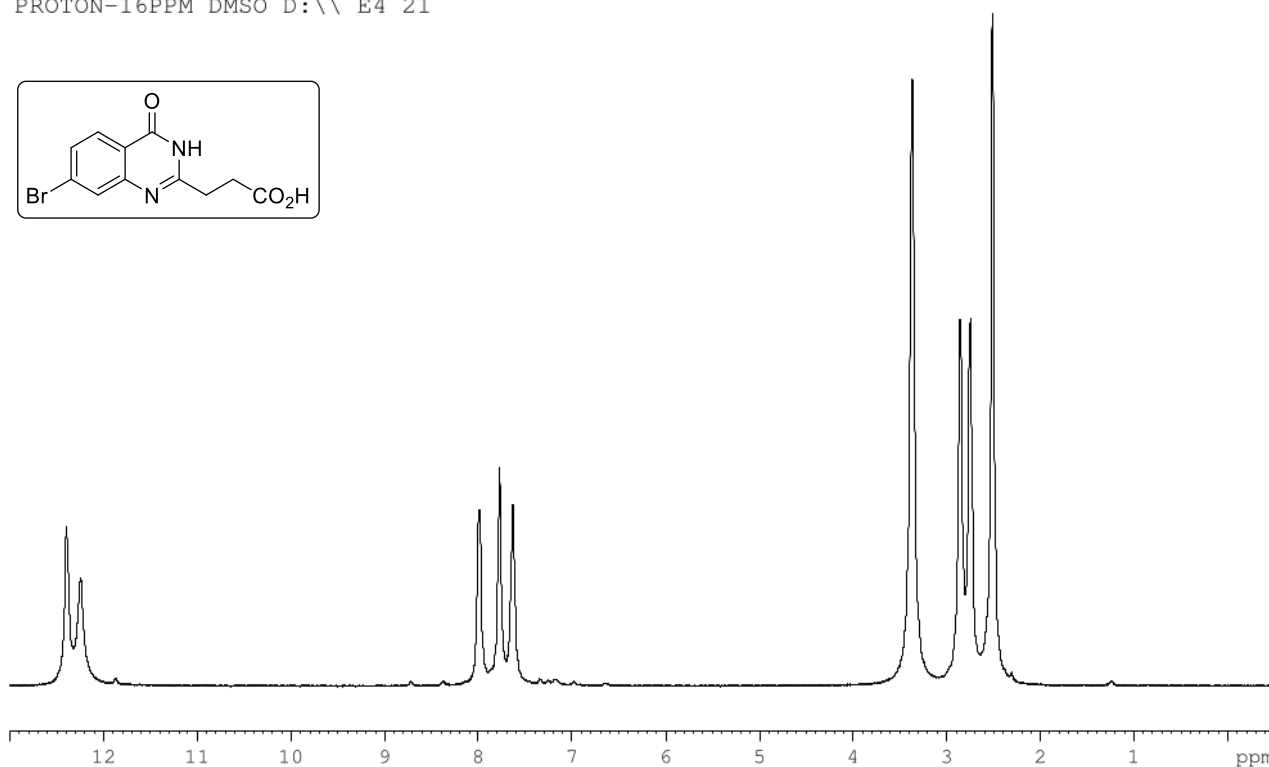

2.00  
173.26  
161.62  
158.58  
150.81  
129.56  
129.50  
129.38  
128.69  
128.37  
128.33  
120.45  
30.15  
29.57

-1heure-D1-5s DMSO D:\ E4 21

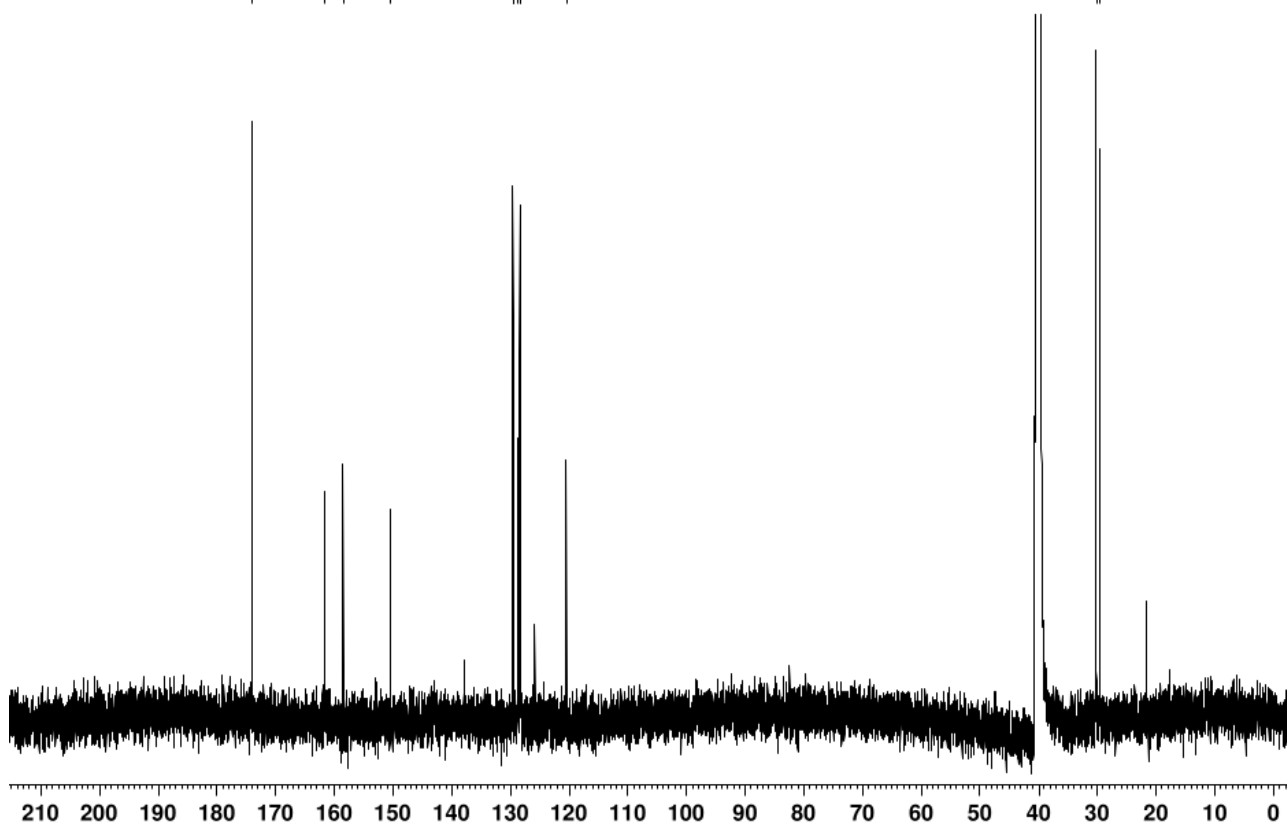

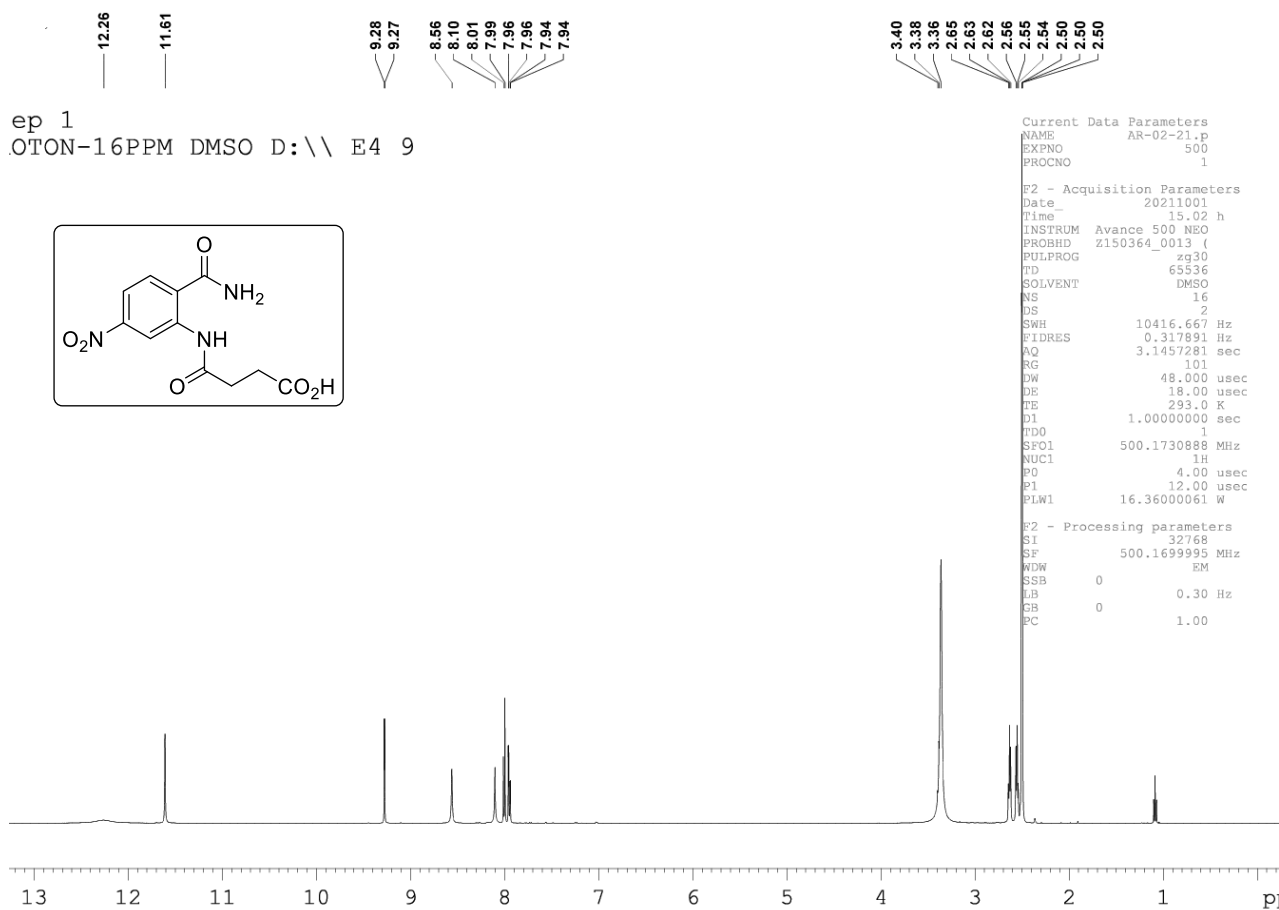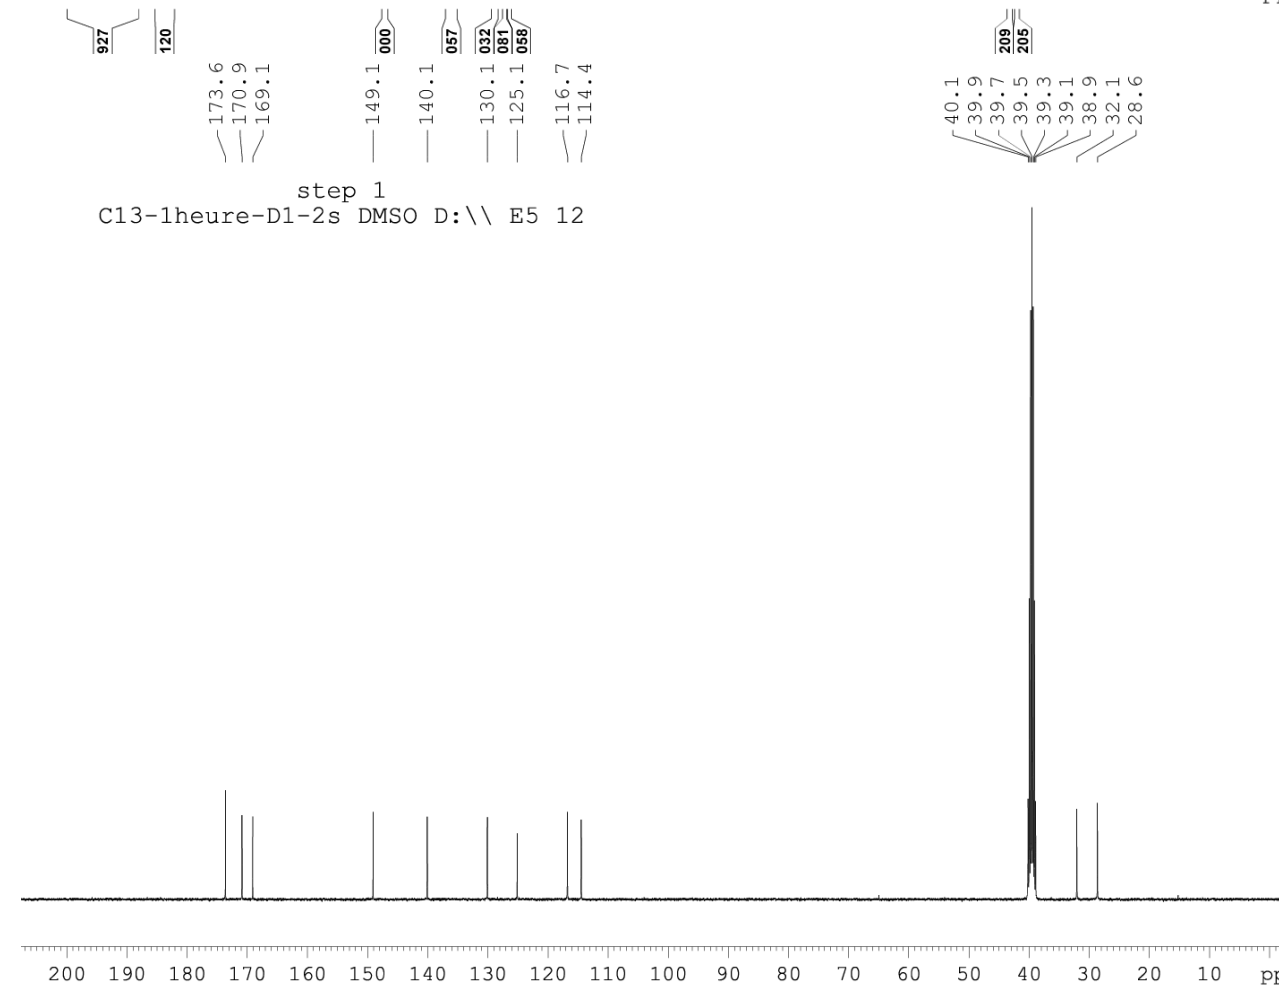

12.61  
12.34

8.25  
8.23  
8.19  
8.15  
8.14  
8.12

3.53  
3.43  
2.90  
2.88  
2.86  
2.78  
2.76  
2.74  
2.50

ep 2  
OTON-16PPM DMSO D:\ E4 3

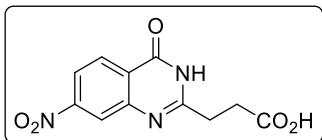

Current Data Parameters  
NAME AR-02-26.p  
EXPNO 400  
PROCNO 1  
  
F2 - Acquisition Parameters  
Date 20211004  
Time 19.42 h  
INSTRUM Avance  
PROBHD Z108618\_0059 (zg30)  
PULPROG zg30  
TD 65536  
SOLVENT DMSO  
NS 16  
DS 2  
SWH 8196.722 Hz  
FIDRES 0.250144 Hz  
AQ 3.9976959 sec  
RG 101  
DW 61.000 usec  
DE 6.50 usec  
TE 296.3 K  
D1 1.00000000 sec  
TDO 1  
SF01 400.1324710 MHz  
NUC1 1H  
PO 5.00 usec  
P1 15.00 usec  
PLW1 10.94299984 W  
  
F2 - Processing parameters  
SI 32768  
SF 400.1300035 MHz  
WDW EM  
SSB 0  
LB 0.30 Hz  
GB 0  
PC 1.00

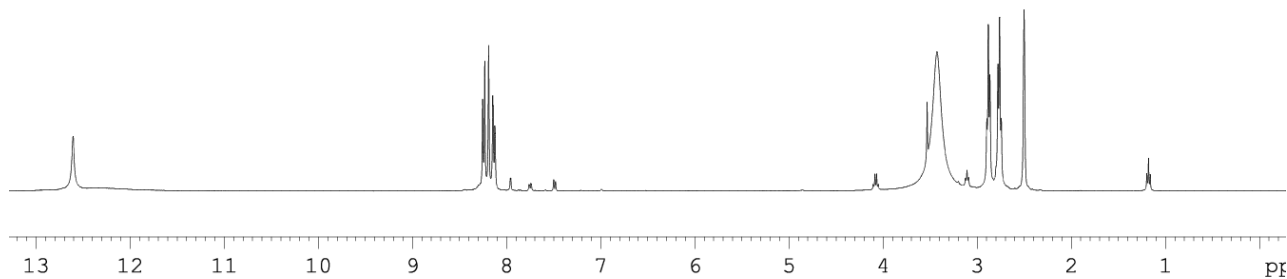

step 2  
C13-1heure-D1-2s DMSO D:\ E4 3

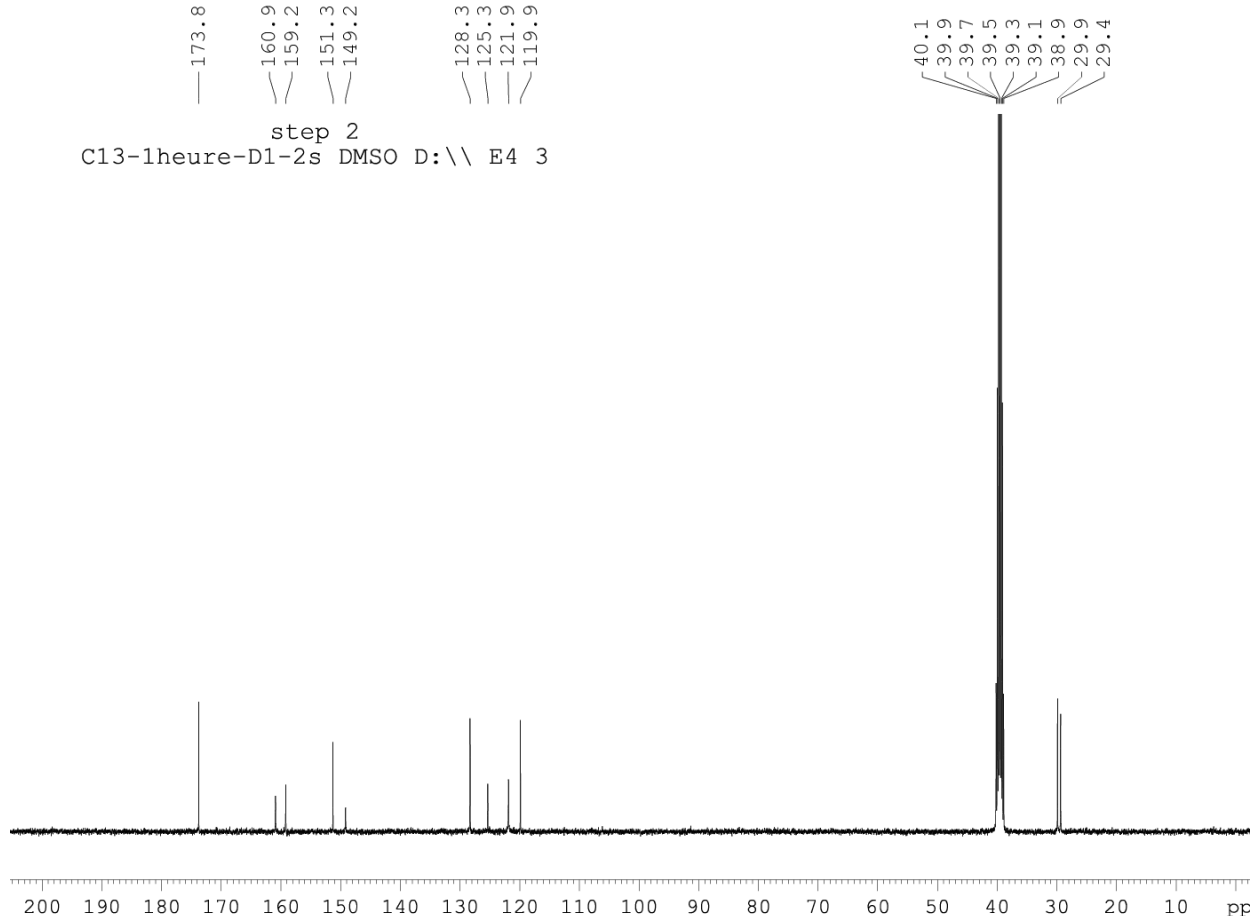

#### 4. $^1\text{H}$ NMR spectra of crude reaction experiments

The figures S1 and S2 show the crude result of experiments performed at different temperatures, powers or times.

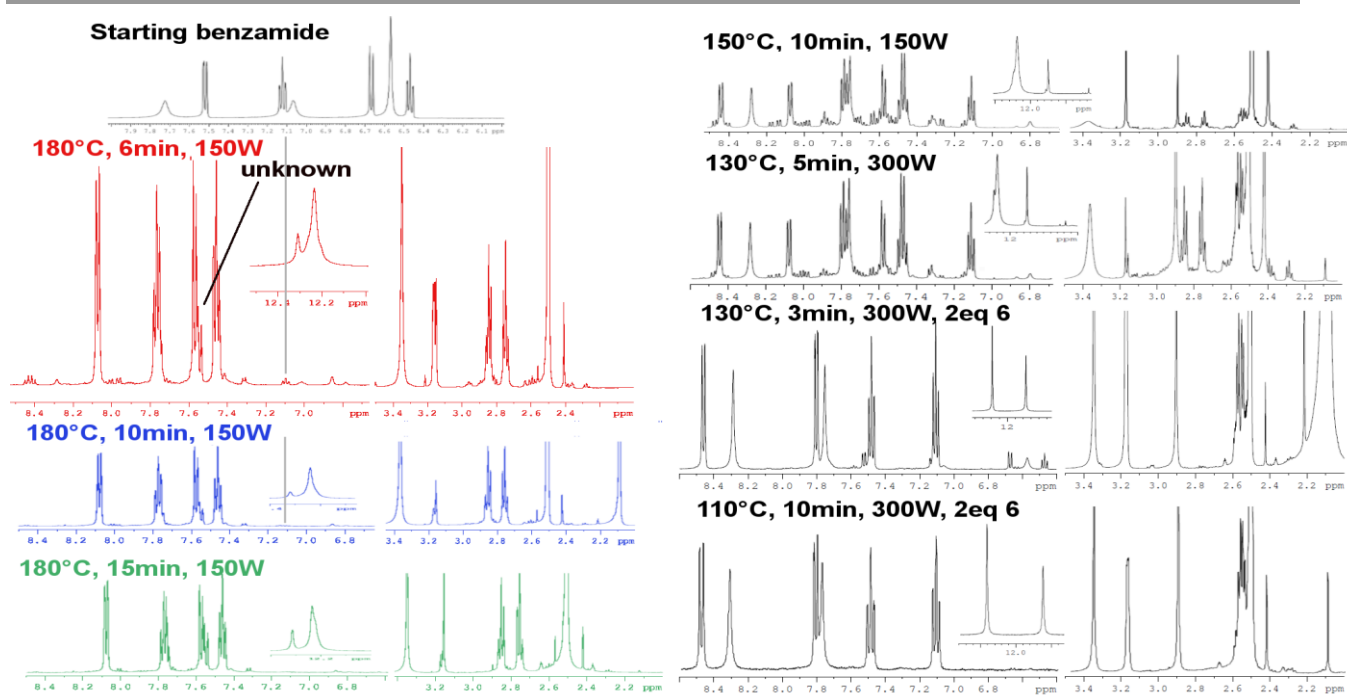

Figure S1.  $^1\text{H}$  NMR spectra of the crude reactions during optimizations studies in the 2.0-3.5, 6.4-8.5 and 11.5-12.5 ppm ranges.

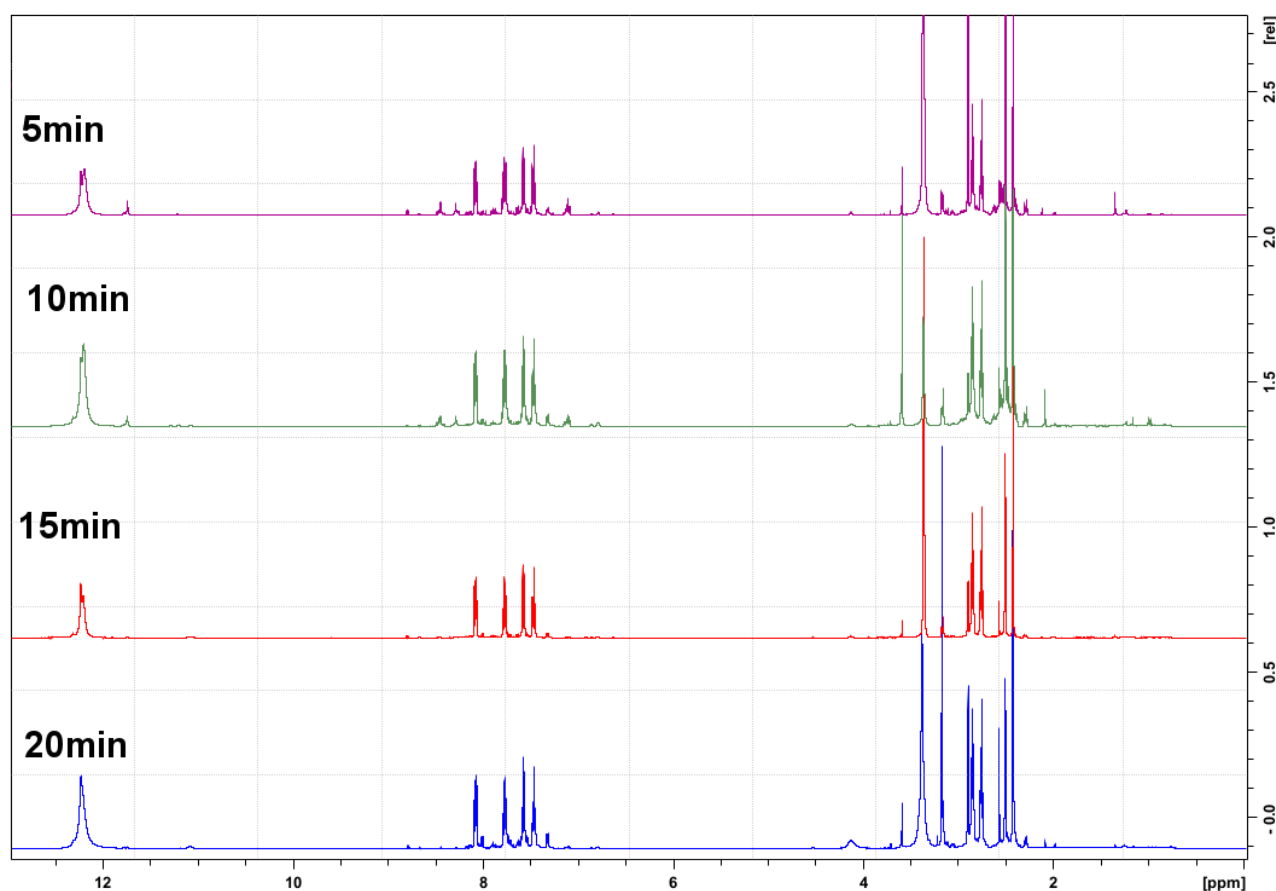

Figure S2.  $^1\text{H}$  NMR spectra of the crude reactions at 180°C and 300W, leading to quinazolinone **8a**.
